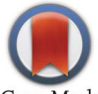

CrossMark  
click for updates

OPEN ACCESS

**Citation:** Malone SL, Staudhammer CL, Oberbauer SF, Olivas P, Ryan MG, et al. (2014) El Niño Southern Oscillation (ENSO) Enhances CO<sub>2</sub> Exchange Rates in Freshwater Marsh Ecosystems in the Florida Everglades. PLoS ONE 9(12): e115058. doi:10.1371/journal.pone.0115058

**Editor:** Ben Bond-Lamberty, DOE Pacific Northwest National Laboratory, United States of America

**Received:** April 18, 2014

**Accepted:** November 10, 2014

**Published:** December 18, 2014

This is an open-access article, free of all copyright, and may be freely reproduced, distributed, transmitted, modified, built upon, or otherwise used by anyone for any lawful purpose. The work is made available under the Creative Commons CC0 public domain dedication.

**Data Availability:** Gap-filled flux data for Taylor Slough and Shark River Slough are made available through AmeriFlux (<http://ameriflux.ornl.gov>). Long-term weather data were obtained from the NCDRC Royal Palm Ranger Station (25° 23' N/80° 36' W), and are available through the National Oceanic and Atmosphere Administrations Earth Physical System Research Laboratory (<http://www.esrl.noaa.gov/psd/data/climateindices>). The Oceanic Niño Index (ONI) was retrieved from the National Oceanic and Atmosphere Administrations Earth Physical System Research Laboratory (<http://www.esrl.noaa.gov/psd/data/climateindices>). PDSI data were retrieved from the National Climatic Data Center (<http://www.ncdc.noaa.gov/temp-and-precip/drought/historical-palmers.php>).

**Funding:** Funding for the research was provided by the National Science Foundations (NSF) Division of Atmospheric and Geospace Sciences (AGS) Atmospheric Chemistry program through grant 1233006 [GS SFO], the Department of Energy's (DOE) National Institute for Climate Change Research (NICCR) through grant 07-SC-NICCR-1059 [GS SFO], and the US Department of Education Graduate Assistantships in Areas of National Need (GAANN) grant [SLM]. This research was also supported by the National Science Foundation (NSF) through the Florida Coastal Everglades Long Term Ecological Research program under Cooperative Agreements DBI-0620409 and DEB-9910514 [GS SFO]. The funders had no role in study design, data collection and analysis, decision to publish, or preparation of the manuscript.

RESEARCH ARTICLE

# El Niño Southern Oscillation (ENSO) Enhances CO<sub>2</sub> Exchange Rates in Freshwater Marsh Ecosystems in the Florida Everglades

Sparkle L. Malone<sup>1,2\*</sup>, Christina L. Staudhammer<sup>1</sup>, Steven F. Oberbauer<sup>3</sup>, Paulo Olivas<sup>3</sup>, Michael G. Ryan<sup>2,4</sup>, Jessica L. Schedlbauer<sup>3,5</sup>, Henry W. Loescher<sup>6,7</sup>, Gregory Starr<sup>1</sup>

1. Department of Biological Sciences, University of Alabama, Tuscaloosa, AL, United States of America, 2. Rocky Mountain Research Station, US Forest Service, Ft. Collins, CO, United States of America, 3. Department of Biological Sciences, Florida International University, Miami, FL, United States of America, 4. Natural Resource Ecology Laboratory, Colorado State University, Fort Collins, CO, United States of America, 5. Department of Biology, West Chester University, West Chester, PA, United States of America, 6. National Ecological Observatory Network Inc., Boulder, CO, 80301, United States of America, 7. Institute of Arctic and Alpine Research, University of Colorado, Boulder, CO, United States of America

\*[sparklelmalone@fs.fed.us](mailto:sparklelmalone@fs.fed.us)

## Abstract

This research examines the relationships between El Niño Southern Oscillation (ENSO), water level, precipitation patterns and carbon dioxide (CO<sub>2</sub>) exchange rates in the freshwater wetland ecosystems of the Florida Everglades. Data was obtained over a 5-year study period (2009–2013) from two freshwater marsh sites located in Everglades National Park that differ in hydrology. At the short-hydroperiod site (Taylor Slough; TS) and the long-hydroperiod site (Shark River Slough; SRS) fluctuations in precipitation patterns occurred with changes in ENSO phase, suggesting that extreme ENSO phases alter Everglades hydrology which is known to have a substantial influence on ecosystem carbon dynamics. Variations in both ENSO phase and annual net CO<sub>2</sub> exchange rates co-occurred with changes in wet and dry season length and intensity. Combined with site-specific seasonality in CO<sub>2</sub> exchanges rates, El Niño and La Niña phases magnified season intensity and CO<sub>2</sub> exchange rates at both sites. At TS, net CO<sub>2</sub> uptake rates were higher in the dry season, whereas SRS had greater rates of carbon sequestration during the wet season. As La Niña phases were concurrent with drought years and extended dry seasons, TS became a greater sink for CO<sub>2</sub> on an annual basis (−11 to −110 g CO<sub>2</sub> m<sup>−2</sup> yr<sup>−1</sup>) compared to El Niño and neutral years (−5 to −43.5 g CO<sub>2</sub> m<sup>−2</sup> yr<sup>−1</sup>). SRS was a small source for CO<sub>2</sub> annually (1.81 to 80 g CO<sub>2</sub> m<sup>−2</sup> yr<sup>−1</sup>) except in one exceptionally wet year that was associated with an El Niño phase

**Competing Interests:** The authors have declared that no competing interests exist.

( $-16 \text{ g CO}_2 \text{ m}^{-2} \text{ yr}^{-1}$ ). Considering that future climate predictions suggest a higher frequency and intensity in El Niño and La Niña phases, these results indicate that changes in extreme ENSO phases will significantly alter CO<sub>2</sub> dynamics in the Florida Everglades.

## Introduction

Teleconnections from the El Niño Southern Oscillation (ENSO) are known to strongly affect climate patterns across North America [1, 2, 3, 4]. ENSO cycles are alternating periods of warm (El Niño phase) and cold (La Niña phase) Pacific Ocean surface temperatures [5, 6], and have occurred with regular periodicity (3 to 7 years) over the last 130,000 years [3]. Shown to influence worldwide precipitation patterns [3], ENSO phases are also correlated with global terrestrial productivity [7] and climate anomalies [3, 8].

In the Florida Everglades, changes in the long-term hydrologic cycle have been linked to extreme ENSO phases (El Niño and La Niña phases) [2, 9]. Precipitation patterns in this region form wet and dry seasons, the frequency and magnitude of which fluctuate with changing climate patterns [8]. Here, El Niño phases increase dry season rainfall causing higher seasonal and annual water levels [2, 9]. In contrast, La Niña phases reduce dry season rainfall, leading to extreme drought and the water table dropping below the soils surface [2, 3, 4, 9]. Because annual shifts in carbon dioxide (CO<sub>2</sub>) exchange rates have been linked to changes in surface hydrology in short-term studies [10, 11, 12, 13], El Niño and La Niña phases may be an important driver of seasonal-to-interannual variations in hydrology and ultimately the productivity of Everglades freshwater marsh ecosystems. It is well known that wetland ecosystem structure and function is tightly coupled to hydrology, and as such it controls wetland carbon (C) sequestration [8, 13, 14, 15]. Wetland CO<sub>2</sub> exchange rates respond to changes in surface hydrology [11, 13, 16]. The magnitudes of intra- and inter-annual fluctuations in surface hydrology are sensitive to global climate cycles [2], and directly affect CO<sub>2</sub> exchange. As a result, inter- and intra-annual fluctuations in CO<sub>2</sub> exchange rates in the Everglades region may be significantly influenced by El Niño and La Niña phases.

Increased atmospheric concentrations of CO<sub>2</sub> and other greenhouse gases are expected to alter the frequency of El Niño and La Niña phases [17]. In addition to the El Niño and La Niña-driven effects, climate change projections also suggest changes in the magnitude and frequency of seasonal precipitation patterns, as well as higher dry season temperatures [9, 18]. Precipitation projections suggest wetter summers (wet season) and more severe drought (dry season) over the southeastern U.S. [19]. Fluctuations in water availability as a result of these changes may alter ecosystem structure and function.

Surface hydrology is managed differently among watersheds within Everglades National Park, which provides a unique opportunity to examine ecosystem function with differing hydroperiods, while still experiencing similar climate. Schedlbauer et al. [12] and Jimenez et al. [11] have assessed the effects of managed hydroperiods on seasonal and annual carbon (C) dynamics for short periods (1 to 2 years) in Everglades freshwater marsh ecosystems. However, there has been no research to date that has assessed the effects of ENSO teleconnections on seasonal and annual CO<sub>2</sub> dynamics in the Everglades. Because El Niño and La Niña phases are expected to alter the frequency and intensity of precipitation and temperature regimes, it is unknown how, when, and with what magnitude ecosystem CO<sub>2</sub> exchange rates will respond to these fluctuations. However, this information is key to develop a prognostic understanding of how these ecosystems will behave in the future.

*The goal of this research is to understand the relationship between extreme ENSO phases and intra- and inter-annual fluctuations in CO<sub>2</sub> exchange rates (NEE, R<sub>eco</sub>, and GEE). We hypothesize that El Niño and La Niña will amplify the site-specific seasonal responses in CO<sub>2</sub> fluxes. At the short-hydroperiod site (Taylor Slough; TS) it has been shown that enhanced net carbon uptake rates are associated with the dry season, while at the long-hydroperiod site (Shark River Slough; SRS) greater net carbon uptake rates are associated with wet season conditions [11, 16]. As El Niño and La Niña phases increase wet and dry season intensity in the Everglades region [2, 3, 4, 9], we expect the site-specific seasonal response to change correspondingly with changes in season intensity. Season intensity here refers to deviations from the mean water availability, so that larger absolute numbers indicate the season intensity and the sign indicates wetter (+) or dryer (-) conditions. We also hypothesize that the variation in season length will explain differences in the interannual CO<sub>2</sub> dynamics in the respective processes of uptake and efflux. For example, longer and wetter wet seasons will increase the capacity to uptake carbon at long hydroperiod sites, whereas longer and hotter dry seasons will increase the capacity for carbon uptake at short hydroperiod sites. In this study we used the eddy covariance method to estimate whole ecosystem exchanges in CO<sub>2</sub>, and a combination of linear, non-linear and time series modeling techniques to statistically address these hypotheses.*

## Materials and Methods

### Study Site

The Florida Everglades are classified as subtropical wetlands with a year-long growing season and distinct wet and dry seasons that define annual variation [20, 21]. Water enters the Everglades through local precipitation events, which average 1380 mm annually [8], and through regional runoff. Presently, water dynamics are controlled by the South Florida Water Management District, which uses a complex system of canals, levees, and pumping stations [8, 22]. The majority of rainfall (~70%) occurs during the wet season, which begins in May or

early June with convective events and tropical depressions, e.g., thunderstorms and hurricanes [8]. Surface water levels generally increase throughout the wet season, are highest at wet season end in October, and decline to their lowest levels by dry season end in May [3]. During the dry season, the Bermuda High-pressure cell prevents convective clouds from forming thunderstorms, making continental fronts the main source of precipitation [20]. This switch from wet season tropical climate to dry season temperate climate causes distinct changes in the amount of precipitation in the region [20]. Dry season precipitation accounts for ~30% of annual precipitation [8].

The study sites are two oligotrophic freshwater marsh ecosystems that are within the Florida Coastal Everglades (FCE) long-term ecological research (LTER) program in Everglades National Park (FCE-LTER, <http://fcelter.fiu.edu/research/sites/>; Fig. 1). Taylor Slough (25° 26' 16.5" N, 80° 35' 40.68" W) is a short-hydroperiod marsh that is inundated for 4 to 6 months each year (~June to November) and is characterized by shallow (~0.14 m) marl soils overlying limestone bedrock. Mean canopy height ( $Z$ ) and surface roughness ( $d$ ) for this site are 0.73 and ~0.3 m, respectively. Shark River Slough (25° 33' 6.72" N, 80° 46' 57.36" W) is a long-hydroperiod marsh that is inundated ~12 months each year and is characterized by peat soils (~1 m thick) overlying limestone bedrock with ridge and slough microtopography [23]. For this site,  $Z$  and  $d$  are 1.02 and ~0.4 m, respectively. Differences in hydroperiod result from spatial variability in elevation [3] and exposure to surface runoff.

In the Florida Everglades, species assemblages and dominance vary with hydrologic patterns [8]. At TS, the continuous homogeneous canopy is dominated by short-statured (0.73 m) emergent species, *Cladium jamaicense* (Crantz) and *Muhlenbergia capillaris* (Lam.) [24, 25]. With ridge and slough microtopography [23] at SRS, tall (1.34 m) dense, emergent species (e.g., *Cladium jamaicense*, *Eleocharis sp.* and *Panicum sp.*) dominate ridge areas. Sloughs are dominated by short-statured (0.70 m), submerged species (e.g., *Utricularia sp.*). Periphyton exists at both sites on submerged structures and as floating mats at SRS (for a more detailed description of the vegetation, see [8]). For this study, data from January 2009 to December 2013 was used and all research was performed under permits issued by Everglades National Park (EVER-2009-SCI-0070 and EVER-2013-SCI-0058).

## Eddy Covariance and Meteorological Data

At each site, open-path infrared gas analyzers (IRGA, LI-7500, Li-COR Inc., Lincoln, NE) were used to measure CO<sub>2</sub> ( $c$ ; mg mol<sup>-1</sup>) and water vapor molar density ( $\rho_v$ ; mg mol<sup>-1</sup>), and a paired sonic anemometer (CSAT3, Campbell Scientific Inc., Logan, UT) was employed to measure sonic temperature ( $T_s$ ; K) and 3-dimensional wind speed ( $u$ ,  $v$  and  $w$ , respectively; m s<sup>-1</sup>). These paired sensors were 0.09 m apart and installed at 3.30 and 3.24 m above ground level (a.g.l.) at TS and SRS, respectively. Data were logged at 10 Hz on a datalogger (CR1000, Campbell Scientific Inc.) and stored on 2 GB CompactFlash cards. Both

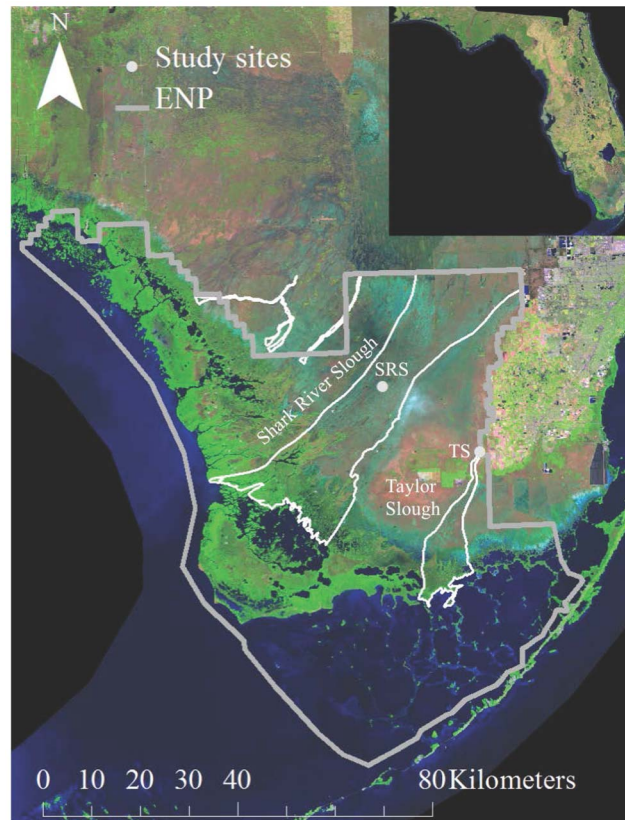

**Fig. 1. Short- (TS) and long- (SRS) hydroperiod freshwater marsh sites within Everglades National Park, Florida, U.S.A.** This map was developed using files created by the Florida Coastal Everglades (<http://fcelter.fiu.edu/data/GIS>) and LandSat imagery, 2004 LandSat 7 ETM 3-4-5 Statewide Mosaic UTM, made available by the South Florida Water Management District ([tp://ftp.sfwmd.gov/pub/gisdata/tm2004\\_345\\_mos\\_utm.zip](tp://ftp.sfwmd.gov/pub/gisdata/tm2004_345_mos_utm.zip)).

doi:10.1371/journal.pone.0115058.g001

IRGAs were calibrated monthly using a trace gas standard for CO<sub>2</sub> in air (+1.0%), dry N<sub>2</sub> gas and a portable dewpoint generator (LI-610, LI-COR Inc.). Footprint analyses [26, 27] indicated that 80% of measured fluxes were within 100 m of the tower during convective conditions at both sites. Other meteorological variables were measured at 1-sec and collected as half-hourly averages, acquired by the same datalogger, and included: air temperature, (T<sub>air</sub>; °C) and relative humidity (Rh; %) (HMP45C, Vaisala, Helsinki, Finland) mounted within an aspirated shield (43502, R.M. Young Co., Traverse City, MI), and barometric pressure (P; atm) (PTB110, Vaisala). The T<sub>air</sub>/Rh sensors were installed at the same height a.g.l. as the IRGA and CSAT.

At each site, additional meteorological data was measured at 15-sec, and collected as 30-min averages through a multiplexer (AM16/32A Campbell Scientific Inc.) with another datalogger (CR10X Campbell Scientific Inc.). This included photosynthetically active radiation (PAR; μmol m<sup>-2</sup> s<sup>-1</sup>) (PAR Lite, Kipp and Zonen Inc., Delft, Netherlands), incident solar radiation (R<sub>s</sub>; W m<sup>-2</sup>) (LI-200SZ, LI-COR Inc.), and net radiation (R<sub>n</sub>; W m<sup>-2</sup>) (CNR2-L, Kipp and



Zonen). Precipitation measurements were made with tipping bucket rain gages (mm) (TE525, Texas Electronics Inc., Dallas, TX). Soil volumetric water content (VWC; %) was calculated from equations developed for peat and marl soils using the methodology of Veldkamp & O'Brien [28], from the dielectric constant using two soil moisture sensors (CS616, Campbell Scientific Inc.) installed at a 45° angle at the soil surface, at each site. Soil temperature ( $T_s$ ; °C) was measured at 5 cm, 10 cm, and 20 cm depths at two locations within each site using insulated thermocouples (Type-T, Omega Engineering Inc., Stamford, CT). When inundated at SRS, water temperature, ( $T_w$ ; °C) was measured using two pairs of insulated thermocouples (Type-T, Omega Engineering Inc.), each pair located at a fixed height 5 cm above the soil surface and another attached to shielded floats that held the thermocouples 5 cm below the water surface. At TS,  $T_w$  was measured using insulated thermocouples (Type-T, Omega Engineering Inc.) located at a fixed height 2 cm below the water surface. Water level (m) at both sites was recorded every half-hour with a water level logger (HOBO U20-001-01, Onset, Bourne, MA).

### Data processing

Net ecosystem exchange (NEE) of CO<sub>2</sub> was estimated through simplification of the continuity equation by applying a control volume approach from the ground level to the top measurement height ( $z$ ; m) [29]. Vertical windspeed ( $w$ ) was first estimated mean to streamline using a 2-d rotation in a Cartesian coordinate framework [29]. NEE ( $\mu\text{mol m}^{-2} \text{s}^{-1}$ ) was then estimated using the covariance of the turbulent fluctuations of the vertical rate of change of mean molar density of CO<sub>2</sub> ( $c'$ ), and the vertical scalar flux divergence ( $w'$ ), where the turbulent fluctuations are the instantaneous deviation (at 10 Hz) from the mean block average (term I) over 30 min, and the storage flux (term II):

$$NEE = \underbrace{\overline{w'c'}}_I(z=Z) + \underbrace{\int_0^z \frac{\partial \bar{c}}{\partial t} \partial z}_II \quad (1)$$

where,  $\overline{w'c'}$  is the measured covariance ( $\text{m s}^{-1} \mu\text{mol C mol}^{-1}$ ) of the molar density of CO<sub>2</sub> measured at a fixed plane above the plant canopy ( $Z$ ),  $z$  is the vertical dimension, and the overbar is the averaging period, in this case is 30-min. NEE was then divided by the molar volume of air,  $V$ , ( $\text{m}^3 \text{mol}^{-1}$ ) to convert the units from density to molar fraction, i.e.,  $\mu\text{mol CO}_2 \text{m}^{-2} \text{s}^{-1}$ , such that:

$$V = \frac{RT_k}{\rho} \quad (2)$$

where,  $R$  is the ideal gas constant ( $0.082 \text{ L atm K}^{-1} \text{ mol}^{-1}$ ),  $P$  is atmospheric pressure (1.10325 atm), and  $T_k$  is the actual air temperature, estimated by:

$$T_k = \frac{T_s + 273.15}{1 + 0.000321q} \quad (3)$$

where,  $q$  is the molar fraction of water vapor calculated by unit conversion of  $\rho_v$ . Micrometeorological convention is used here, where negative NEE values indicate ecosystem uptake of CO<sub>2</sub>.

Sensible heat ( $H$ ; W m<sup>-2</sup>) was determined from the covariance of the turbulent fluctuations of  $w$  and  $T_s$ , and  $w$  and  $q$  (noted as primes, rf. [29]) estimated over a 30-min averaging period (noted as overbar), such that,

$$H = \rho_{air} C_p (\overline{w'T'} - (0.000321 T_k \overline{w'q'})) \quad (4)$$

where,  $\rho_{air}$  is the air density (kg m<sup>-3</sup>) and  $C_p$  is the specific heat of air at constant pressure (J kg<sup>-1</sup> °C<sup>-1</sup>). Corrections for the effect of water vapor on the speed of sound were applied [30].

Similarly, latent energy ( $LE$ ; W m<sup>-2</sup>) was calculated from the covariance of the turbulent fluctuations of  $w$  and  $\rho_v$  and averaged over 30-min,

$$LE = \frac{P}{RT_s} \frac{M_{air}}{M_w \cdot 10^3} \lambda \overline{w'\rho_v'} \quad (5)$$

where,  $\lambda$  is the heat of vaporization (J g<sup>-1</sup>), and  $M_{air}$  and  $M_w$  are the molecular weights of air (28.965 g mol<sup>-1</sup>) and water (18.01 g mol<sup>-1</sup>), respectively. Corrections for thermal and pressure related expansion and/or contraction, and water dilution were applied [31].

10 Hz raw flux data were processed with EdiRe (v. 1.4.3.1184, [32]), which included despiking and air density corrections [31, 33]. Fluxes (NEE, H, LE) were then corrected for mass transfer resulting from changes in density not accounted for by the IRGA [31, 34], and barometric pressure data were used to correct the fluxes to standard atmospheric pressure. All measurements were filtered when systematic errors in either NEE, H or LE were indicated, such as: (1) evidence of rainfall, condensation, or bird fouling in the sampling path of the IRGA or sonic anemometer, (2) incomplete half-hour datasets during system calibration or maintenance, (3) poor coupling of the canopy with the external atmospheric conditions, as defined by the friction velocity,  $u^*$ , using a threshold  $<0.15$  m s<sup>-1</sup> [35, 36], and (4) excessive variation from the half-hourly mean based on an analysis of standard deviations for  $u$ ,  $v$ , and  $w$  wind and CO<sub>2</sub> statistics. Quality assurance of the flux data was also maintained by examining plausibility tests for implausible H ( $<-100$  or  $>800$  Wm<sup>-2</sup>), LE ( $<-100$  or  $>800$  Wm<sup>-2</sup>), and NEE (i.e.,  $NEE <-30$  or  $>30$  μmol m<sup>-2</sup> s<sup>-1</sup>) values, stationarity criteria, and integral turbulent statistics [37, 38]. At TS, 38% and 77% of the day and nighttime data were removed, respectively. At SRS, 34% of daytime data and 70% of nighttime data were removed. Missing H and LE were then gap-filled using the linear relationship between H or LE and  $R_n$  on a monthly basis. When  $R^2$  values were less than 70%, annual relationships between  $R_n$  and H or LE were used to gap fill data in that month.

Missing half hourly NEE data were gap-filled using separate functions for day and night. When PAR was  $\geq 10$  W m<sup>-2</sup>, NEE data was gap-filled using a Michaelis-Menton approach ( $NEE_{day}$ ; Eq. 6), and when PAR was  $<10$  W m<sup>-2</sup>, NEE data was gap-filled using an Arrhenius approach ( $NEE_{night}$ ; Eq. 7):

$$NEE_{day} = R_{eco} - \frac{\alpha\phi P_{max}}{\alpha\phi + P_{max}} \quad (6)$$

where,  $\alpha$  is the apparent quantum efficiency ( $\frac{CO_2}{\phi}$ ),  $\phi$  is PAR,  $R_{eco}$  is ecosystem respiration ( $\mu\text{mol CO}_2 \text{ m}^{-2} \text{ s}^{-1}$ ), and  $P_{max}$  is the maximum ecosystem CO<sub>2</sub> uptake rate ( $\mu\text{mol CO}_2 \text{ m}^{-2} \text{ s}^{-1}$ ).

$$NEE_{night} = R_{eco} = R_0 \exp^{b - T_{air}} \quad (7)$$

where,  $R_0$  is the base respiration rate when air temperature is 0 °C and  $b$  is an empirical coefficient. In [equation 6](#),  $R_{eco}$  is an estimated model parameter, whereas  $R_{eco}$  measurements are the dependent variable in [equation 7](#). A bootstrap method was used for error estimation of gap-filled values of NEE. Synthetic datasets (1000) of size  $n$  (with replacement) from the original dataset of size  $n$  for each estimated gap-filling model (Eq.6 and Eq.7) on a monthly or annual basis where appropriate were used [11]. Distributions of each model parameter were constructed, which were then checked to ensure that the model parameters derived from the original data were contained within a 95% confidence region. Following gap filling, GEE was calculated from half hourly NEE and  $R_{eco}$  data (Eq. 8).

$$GEE = NEE - R_{eco} \quad (8)$$

Gap-filled flux data for TS and SRS are made available through AmeriFlux (<http://ameriflux.ornl.gov>).

## Defining Seasons

Although the majority of rain in the Everglades region falls in the wet season, it is difficult to identify the exact onset of the wet season. Previous studies define season based on the calendar year [39] or water levels [11, 12]; however, these approaches either do not capture interannual variations or are heavily influenced by water management activities performed by the South Florida Water Management District. To determine the date of the shift in seasons we examined the seasonal pattern of Bowen ratios over time,

$$\beta_t = \frac{H_t}{LE_t} \quad (9)$$

where, the subscript  $t$  denotes the  $t^{\text{th}}$  daily value in the time series. Similar to methods used by Nuttle [40] to define hydroperiods, a harmonic function (sine function) was fit to the  $\beta$  time series to identify inflection points that indicate changes in the seasonal trend of the ratio of energy dissipation as  $H$  and  $LE$  (Fig. 2). A sine function was fit to the  $\beta$  time series at each site annually (Jan 1 to Dec 31), and the inflection point along the positively sloped portion of each sine function was used to identify the change from dry to wet season (Fig. 2). The wet season was defined by fitting the sine function to the same set of site-specific series



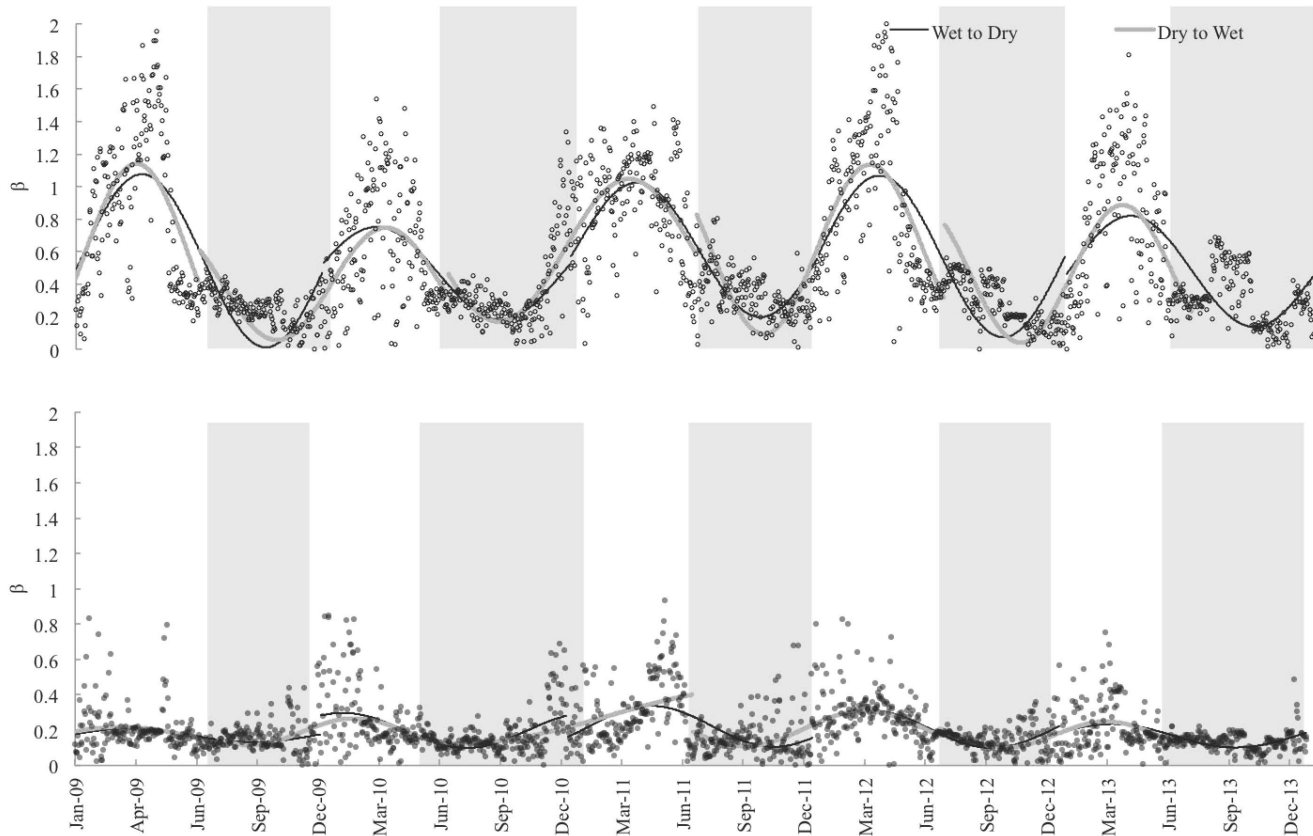

**Fig. 2. Time series of  $\beta$  for (a) TS and (b) SRS.**  $\beta$  was used to determine the change from dry to wet, and wet to dry seasons. Sine functions were fit to the  $\beta$  time series by year and by sites. The initiation of the dry season was determined by fitting a sine function annually (Jan 1 to Dec 31). The inflection point along the positively sloped portion of each sine function identified the change from dry to wet season. The initiation of the wet season was defined by fitting a sine function offset by  $-182$  days ( $\sim 6$  months), and determining the inflection point along the negatively sloped portion of each sine function. The shaded region highlights the wet season.

doi:10.1371/journal.pone.0115058.g002

offset by  $-182$  days ( $\sim 6$ -months) and identifying the inflection point along the negatively sloped portion of each sine function. The sine function was offset by  $-182$  days so that the shifts in season would not occur near the end of the time series. Previous studies show marked seasonal shifts in energy dissipation in short and long hydroperiod marsh ecosystems (S. Malone, unpublished data) and therefore this method of seasonal classification should adequately capture the seasonality in both water and energy availability.

As an indication of season intensity, the seasonal mean Palmer Drought Severity Index was used (PDSI; Fig. 3a) [41]. PDSI compares weather conditions to historical weather data, taking into account temperature, rainfall, and the local available water content of the soil. PDSI uses 0 to identify normal conditions, negative numbers ( $-1$  to  $-6$ ) to indicate dryer than average conditions, and positive numbers to reflect excess rain (Fig. 3). PDSI data were retrieved from the National Climatic Data Center (<http://www.ncdc.noaa.gov/temp-and-precip/drought/historical-palmers.php>).

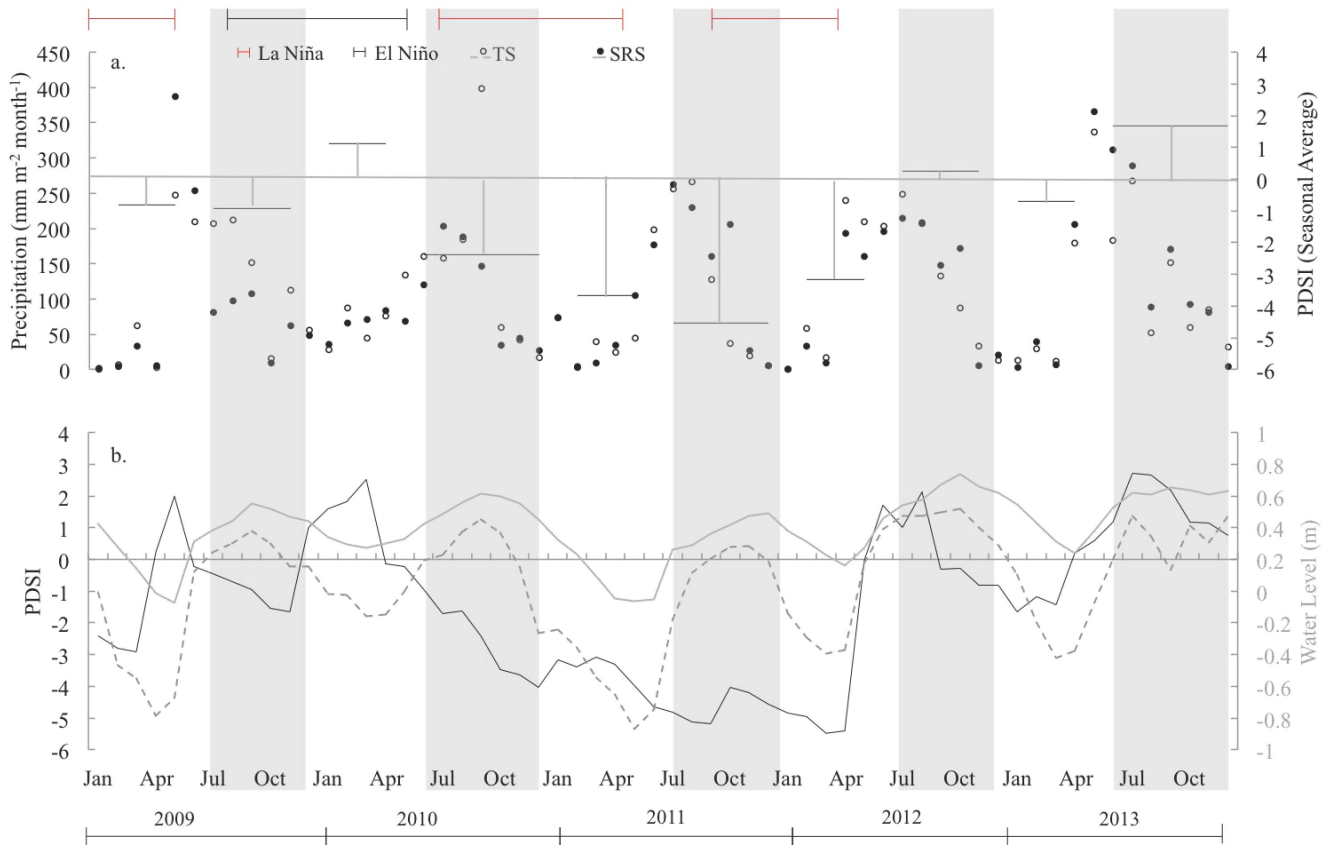

**Fig. 3. Time series of precipitation, PDSI, and water levels at TS and SRS.** (a) Shows monthly cumulative precipitation (mm) and season intensity (as measured by seasonal average PDSI), (b) shows monthly average Palmer Drought Severity Index (PDSI), water level (m), and El Niño and La Niña phase.

doi:10.1371/journal.pone.0115058.g003

### Long-term weather data

Long-term weather data were obtained from the nearest weather station, NCDC Royal Palm Ranger Station (25° 23'N/80° 36'W), where NOAA surface meteorological data was available from 1964 to 2013. The Oceanic Niño Index (ONI) was used to define extreme ENSO phases and was retrieved from the National Oceanic and Atmosphere Administrations Earth Physical System Research Laboratory (<http://www.esrl.noaa.gov/psd/data/climateindices>). The ONI is the running 3-month mean sea surface temperature (SST) anomaly from a 30-year mean SST for the Niño 3.4 region (i.e., 5° N-5° S, 120° -170° W). Cold (warm) phases are defined as 5 consecutive months at or below (above) the -0.5° (+0.5°) anomaly.

### Data Analysis

#### Long-term patterns in monthly weather data

An intervention time series approach was used [42], utilizing autoregressive integrated moving average (ARIMA) models and the SAS procedure PROC ARIMA (version 9.3, SAS Institute Inc., Cary, North Carolina) to model 3

variables describing weather for the site, (e.g., monthly precipitation, average maximum daily temperature, and average minimum daily temperature) as a function of ENSO phase. ARIMA models incorporate 3 types of processes: autoregressive (AR) of order  $p$ , moving average (MA) of order  $q$ , and if necessary, differencing of degree  $d$  [42]. ARIMA models fit to time series data use AR and MA terms to describe the serial dependence, and use other time series data from independent variables to explain the dependence on outside factors [42]. The advantage of using ARIMA models is that the internal structure of the data (e.g., autocorrelation, seasonality) is explicitly accounted for by incorporating past values. For example, a first-order autoregressive moving average, or ARIMA(1,1) model, predicts the current time period value ( $Y_t$ ) using its one period previous value ( $Y_{t-1}$ ) and its associated error ( $\varepsilon_{t-1}$ ):

$$Y_t = \mu + \alpha_1 Y_{t-1} + \varepsilon_t + \theta \varepsilon_{t-1} \quad (10)$$

where:  $\mu$  is the mean of the series,  $\alpha_1$  is the first-order AR coefficient,  $\theta$  is the first-order MA coefficient,  $\varepsilon_t$  is the current period error, and  $\varepsilon_{t-1}$  is its one period previous error. “Memory” can be added to the model by adding lags and associated MA and/or AR components, and potential covariates can also be added as predictor variables, which may also have lagged components.

To facilitate the inclusion of independent categorical variables for ENSO, El Niño and La Niña phases were coded as indicator variables, where a value 0 or 1 specified the absence or presence, respectively, of a categorical effect. We then determined if there were teleconnection lags between ENSO phase and precipitation and temperature.

In developing time series models, first, all data series were tested for stationarity via the augmented Dickey-Fuller unit root test [43]. The ARIMA models were then fit to time series data (monthly precipitation, and minimum and maximum temperature) using an iterative Box-Jenkins approach, where: (1) autocorrelation and partial autocorrelation analysis were used to determine if AR and/or MA terms were necessary for the given time series, (2) model coefficients were calculated using maximum likelihood techniques and, (3) autocorrelation plots of model residuals were examined to further determine the structure of the model [42].

Because of the presence of autocorrelation in the explanatory series, input series were pre-whitened [42]. ARIMA models were then fit to the dependent variables using the pre-whitened explanatory series as predictor variables. Cross-correlation coefficient plots between the explanatory series and dependent variables were used to identify direct and inverse relationships at various lags or time shifts, and autocorrelation plots of the residuals verified that the residual series had characteristics of random error, or white noise [42]. Model selection was based on minimum Akaike’s information criterion (AIC) and models were acceptable when residual white noise was minimized [44]. A backwards selection method was used, removing the least significant parameter one at a time until all regression terms in the final model were significant at the  $\alpha=0.05$  level and the lowest AIC was

achieved. ARIMA assumptions of normality and independence of residuals [42] were verified by examining residual plots.

### Seasonal light and temperature response

To examine changes in the response of NEE and  $R_{eco}$  to light and temperature, respectively, non-linear equations (6) and (7) were fit. Parameters for these models were fit by ENSO phase, site and season via the SAS procedure PROC NLIN (version 9.3, SAS Institute Inc., Cary, North Carolina). Parameter estimates were then compared to identify differences and similarities. As a result of the high degree of autocorrelation inherent in NEE time series from half-hourly data, the standard errors of parameter estimates from these models are artificially small, and statistical tests are not valid. Therefore, this analysis is presented in a descriptive context.

### Daily CO<sub>2</sub> and water dynamics

An intervention time series approach was used to identify and model the relationship between CO<sub>2</sub> dynamics (*NEE*, *GEE*, and  $R_{eco}$ ) and a set of explanatory variables over a 5-year time series of daily data (2009 to 2013). These variables included: water level, season, ENSO phase (El Niño, La Niña and neutral), daily precipitation, drought condition, and average air temperature. The combined effect of ENSO phase and season (e.g. El Niño × wet season and El Niño × dry season) on CO<sub>2</sub> fluxes were included in time series models as predictors with indicator variables. Indicator variables were also developed to identify sections of each season that directly followed an ENSO phase (post-La Niña and post-El Niño). Beckage et al. [3] found the effect of extreme ENSO phases during seasonal transitions, and post-La Niña and post-El Niño phases capture the transition periods. To explore the effect of precipitation on CO<sub>2</sub> exchange rates, indicator variables were used to identify the day of a precipitation event (*Rain Day*), the day after precipitation, and the quantity of precipitation (*Rain*; mm). The indicator for the day after a precipitation event identified the first rain free day following a day with precipitation. Finally, drought conditions were defined as those days where  $PDSI < -2$  and verified the drought extent with the National Oceanic and Atmospheric Administration's Drought Monitor (Fig. 3b; [45]). Drought Monitor data was obtained from the National Drought Monitor Center (<http://droughtmonitor.unl.edu/DataArchive.aspx>).

In addition, previous studies identified water level as one of the most important drivers for CO<sub>2</sub> exchange rates in the Everglades freshwater ecosystems [11, 16]. Thus, a water index equal to the difference between each half-hourly water level and its site-specific annual seasonal mean water level was computed. Using the water index as a dependent variable in an additional analysis, time series models were estimated to answer questions about the relationship between intraseasonal fluctuations in water levels, precipitation, and ENSO phase.

As in the models of monthly weather data, all daily time series were tested for stationarity and non-stationary series were made stationary by differencing [46]. ARIMA models were then fit to time series data (*NEE*, *GEE*,  $R_{eco}$ , and the *Water*

*Index*) using pre-whitened explanatory series as predictor variables. Cross-correlation coefficient plots identified relationships at various lags, and autocorrelation plots were used to verify that the residuals had characteristics of random error. Model selection was based on minimum AIC, removing the least significant parameters. For each dependent variable, a single model form was selected with common predictor variables to aid site comparisons. Non-significant parameters remained in the model only if the parameter was significant at one site and it did not affect the final model of the other site. Multicollinearity between explanatory variables was also explored to ensure models did not contain input series that were highly correlated.

## Results

### Long-term weather patterns

The long term ONI data ranged from 2.5 to  $-2.05$  and indicated that the neutral phase occurred over about half (46%) of the period 1964–2013, while the El Niño and La Niña phases occurred 26 and 27% of this long-term study period, respectively. Neutral phases ranged in length from  $\sim 1$  month to  $>12$  months and just 6 years contained no neutral phase (1969, 1971, 1975, 1987, 1999, and 2000). There were 14 different El Niño and 14 La Niña events, and the average ONI index was  $\sim 1.1$ ,  $-1$ , and  $-0.02$  for all El Niño, La Niña and neutral phases, respectively. Although it is common for an El Niño event to be separated from a La Niña event by a short neutral phase (14 occurrences), a neutral phase occurring between consecutive El Niño (1 occurrence) or La Niña phases (4 occurrences) were less frequent. The majority ( $\sim 52\%$ ) of wet season months (May to October) were associated with a neutral phase while just  $\sim 25\%$  and  $\sim 23\%$  of wet season months occurred during El Niño and La Niña phases, respectively. Dry season months (September to April) were associated with the neutral phase  $\sim 41\%$  of the time, while El Niño and La Niña phases occurred 27 and 32% of time. Time series analysis of long-term monthly precipitation and minimum and maximum daily temperatures versus ENSO phase showed that rain increased the month after the start of El Niño phases (i.e., at a lag of 1 month;  $p=0.1043$ ) and declined the month following the start of La Niña ( $p=0.7719$ ), though not significantly ([Table 1](#); [S1 Fig.](#)). Monthly average maximum daily temperatures were lower the month following the start of La Niña ( $p=0.0001$ ), and during El Niño phases ( $p<0.0001$ ) and at a lag of 1 month ( $p=0.001$ ), compared to neutral phases. Average minimum daily temperatures were lower the month following the start of El Niño ( $p=0.019$ ) and La Niña ( $p=0.0218$ ; [Table 1](#)) phases.

### Shifts in ENSO phase and site conditions (2009–2013)

Throughout the study (2009–2013), 3 short La Niña phases (2009, 2010–2011 and 2011–2012), and an El Niño phase (2009–2010) occurred with shifts in precipitation patterns that resulted in both wetter than average (2010) and drier



**Table 1.** Parameter estimates from ARIMA models of monthly precipitation, and average daily maximum and minimum temperature.

| Parameter   | Precipitation |                |         |              | Temperature (max) |                |         |              | Temperature (min) |                |         |              |
|-------------|---------------|----------------|---------|--------------|-------------------|----------------|---------|--------------|-------------------|----------------|---------|--------------|
|             | Estimate      | Standard Error | t Value | Approx Pr> t | Estimate          | Standard Error | t Value | Approx Pr> t | Estimate          | Standard Error | t Value | Approx Pr> t |
| MA(1)       | 0.2691        | 0.0515         | 5.23    | <.0001       | -0.3868           | 0.0394         | -9.83   | <.0001       | -0.3018           | 0.0399         | -7.57   | <.0001       |
| AR(1)       | 0.4677        | 0.0397         | 11.79   | <.0001       | 0.9972            | 0.0025         | 397.31  | <.0001       | 0.9868            | 0.0064         | 154.31  | <.0001       |
| AR(2)       | 0.4786        | 0.0352         | 13.60   | <.0001       |                   |                |         |              |                   |                |         |              |
| El Niño     | -9.2460       | 16.8264        | -0.55   | 0.5827       | -1.3567           | 0.2735         | -4.96   | <.0001       | -1.7009           | 0.4508         | -3.77   | 0.0002       |
| El Niño (1) | 27.1448       | 16.7098        | 1.62    | 0.1043       | -0.8904           | 0.2714         | -3.28   | 0.001        | -1.0517           | 0.4484         | -2.35   | 0.019        |
| La Niña     | 13.9136       | 17.5394        | 0.79    | 0.4276       | -0.3878           | 0.2805         | -1.38   | 0.1667       | -0.1130           | 0.4568         | -0.25   | 0.8047       |
| La Niña (1) | -5.05061      | 17.4237        | -0.29   | 0.7719       | -0.9126           | 0.2809         | -3.25   | 0.0012       | -1.0465           | 0.4564         | -2.29   | 0.0218       |

MA(1) is the estimated moving average term at a 1- period lags (1 month) and AR(1) and AR(2) are the estimated autoregressive term at a 1- and 2-period lags (1 and 2 months, respectively). Lagged values of independent variables are denoted similarly. *El Niño* is an indicator for El Niño phases and *La Niña* is an indicator for the La Niña phase, determined by the ONI index.

doi:10.1371/journal.pone.0115058.t001

than average years (2009 and 2011; [Fig. 3a](#)). The observed sequence in ENSO phases from 2009 to 2013 has occurred twice (1984–1990; 1997–2001) over the study period. While there has been a cooling trend in the Pacific Ocean since 2007, the El Niño phase in 2009–2010 was short with weak to moderate strength. In 2013, both the wet and dry seasons were in a neutral phase. Neutral phases greater than 12 months were not uncommon over the study period (1964–2013; 9 occurrences). The mean ONI indices during 2009–2013 were similar to that of the 40-year period, with values of 1, -1, and -0.2 for the El Niño, La Niña and neutral phases, respectively. Season intensity, defined by the seasonal average PDSI for the Everglades region, changed with ENSO phases ([Fig. 3a](#)). During La Niña phases, seasonal mean PDSI ranged from ~-1 to -4 ([Fig. 3a](#)). In the wet season of 2009 an El Niño phase began soon after a La Niña phase. The El Niño phase extended into the dry season of 2010 where it co-occurred with wetter than average conditions (PDSI>1). During the neutral phase in 2013, mean wet season PDSI was 1.7 and -0.6 in the dry season.

Although TS and SRS had similar weather, harmonic analysis of  $\beta$  ([Fig. 2](#)) showed that both hydroperiods and season length differed annually and between sites ([Fig. 3b](#)). The onset of the wet season at TS lagged SRS by approximately one month on average, with wet season length varying between 179 to 208 days at TS and 159 to 242 days at SRS. Wet season length was positively correlated with cumulative precipitation from January to March ( $p=0.1495$ ; [Fig. 4a](#)). During abnormally dry years (PDSI<-2), the wet season was shortened by about 15 days at TS and 34 days at SRS compared to all other years. In 2009 and 2011, south Florida experienced severe drought conditions (water levels below the soil surface) resulting in 65 and 34 dry days at TS and SRS, respectively ([Figs. 3 and 4](#)). Drought years were not characterized by lower annual precipitation but by lower rainfall and fewer rain events the 3 months prior to the start of the wet season, which generated a shorter season ([Fig. 4a](#)). In 2010, 2012 and 2013, total rainfall

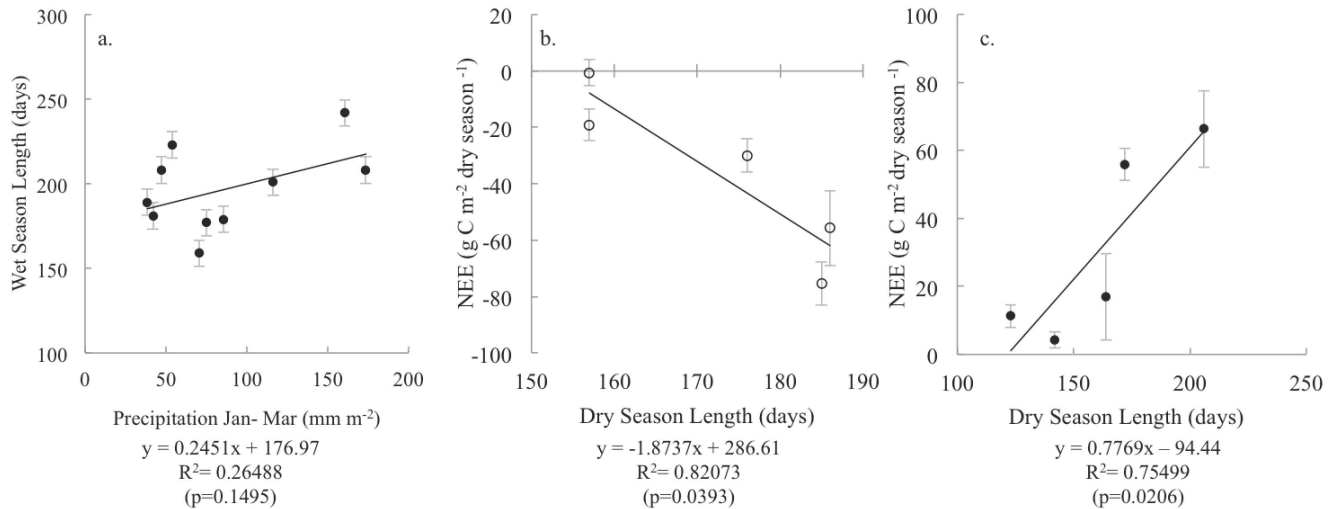

**Fig. 4. Precipitation, season length, and CO<sub>2</sub> Exchange rates.** (a) The relationship between cumulative precipitation (January through March) and wet season length at TS and SRS shows that precipitation prior to the wet season is an important determinant of wet season length. The relationship between dry season length and dry season NEE is positive at (b) TS and negative at (c) SRS.

doi:10.1371/journal.pone.0115058.g004

in the first 4 months of the year averaged 261 mm at TS and 248 mm at SRS, while during drought years (2009 and 2011) TS and SRS received just 107 mm and 82 mm on average, respectively.

### Annual and Seasonal patterns in CO<sub>2</sub> Fluxes

Annual net CO<sub>2</sub> exchange rates at both freshwater marsh ecosystems co-varied with ENSO phase (2009–2013), which corresponded to changes in season intensity. The ratio of GEE to R<sub>eco</sub> suggests that CO<sub>2</sub> exchange rates at both sites were most similar in 2010 (El Niño; S2 Fig.) when hydraulic conditions were comparable between TS and SRS. The lowest rates of NEE (greatest CO<sub>2</sub> uptake) occurred during the La Niña phase at TS followed by the neutral phase. At SRS the greatest CO<sub>2</sub> uptake rates were during the El Niño and neutral phase compared to seasons associated with a La Niña phase (Table 2). The annual ratio of GEE to R<sub>eco</sub> and annual rates of NEE both show that sites were most similar when water levels were higher and during the neutral phase (S2c Fig.).

Although TS ranged from a small CO<sub>2</sub> sink to a small source on an annual basis over the 5 years, TS was often a source for CO<sub>2</sub> during the wet season and a sink during the dry season (Table 2; Figs. 5 and 6), except in 2011 and 2013 when TS was a sink in both seasons. Changes in GEE relative to R<sub>eco</sub> resulted in seasonal shifts in NEE, though there was no consistent pattern in dry season versus wet season response in GEE or R<sub>eco</sub>. The ratio of GEE to R<sub>eco</sub> showed that in 2011 both seasons were comparable at TS and they differed the most in 2012 when a portion of the dry season was during a La Niña phase and the wet season was in a neutral phase (Table 2; S2a Fig.). CO<sub>2</sub> uptake rates were generally higher in the dry season and during the exceptionally dry La Niña years at TS, which corresponded to

**Table 2.** Seasonal and annual NEE, GEE, and R<sub>eco</sub> (g C m<sup>-2</sup> yr<sup>-1</sup>) at Taylor Slough and Shark River Slough.

| Year | Season | TS            |               |                        |               | ENSO | SRS          |               |                        |               |
|------|--------|---------------|---------------|------------------------|---------------|------|--------------|---------------|------------------------|---------------|
|      |        | NEE (S.E)     | GEE (S.E)     | R <sub>eco</sub> (S.E) | Season Length |      | NEE (S.E)    | GEE (S.E)     | R <sub>eco</sub> (S.E) | Season Length |
| 2009 | Dry    | -30.0 (5.9)   | -261.9 (5.8)  | 231.9 (7.3)            | 176           | *    | 66.3 (11.3)  | -163.0 (11.6) | 229.3 (5.2)            | 206           |
|      | Wet    | 19.0 (7.8)    | -194.2 (7.1)  | 213.2 (8.8)            | 189           | •    | 13.7 (3.6)   | -198.3 (5.4)  | 211.9 (4.5)            | 159           |
|      | Annual | -11.0 (13.7)  | -456.1 (12.9) | 445.1 (16.1)           |               |      | 80.0 (14.9)  | -361.3 (17.0) | 441.3 (9.7)            |               |
| 2010 | Dry    | -19.1 (5.6)   | -199.2 (4.2)  | 180.1 (5.3)            | 157           | •    | -11.3 (3.4)  | -249.3 (3.3)  | 238.0 (1.9)            | 123           |
|      | Wet    | 13.8 (7.1)    | -219.3 (6.0)  | 233.1 (7.0)            | 208           | *    | -4.7 (8.3)   | -92.3 (7.4)   | 87.6 (5.8)             | 242           |
|      | Annual | -5.3 (12.7)   | -418.5 (10.2) | 413.2 (12.2)           |               |      | -16.0 (11.6) | -341.6 (10.8) | 325.6 (7.7)            |               |
| 2011 | Dry    | -55.7 (13.3)  | -302.7 (14.0) | 246.9 (11.6)           | 186           | *    | 16.9 (12.7)  | -230.9 (7.0)  | 247.7 (10.8)           | 164           |
|      | Wet    | -54.8 (14.8)  | -308.6 (12.8) | 253.8 (15.4)           | 179           | *    | 59.5 (7.3)   | -151.6 (7.4)  | 211.2 (7.4)            | 201           |
|      | Annual | -110.5 (28.1) | -611.3 (26.8) | 500.8 (27.0)           |               |      | 76.4 (20.0)  | -382.5 (14.4) | 458.9 (18.1)           |               |
| 2012 | Dry    | -75.4 (7.6)   | -249.9 (7.9)  | 174.6 (7.7)            | 185           | *    | 55.9 (4.7)   | -115.8 (3.4)  | 171.7 (3.1)            | 172           |
|      | Wet    | 31.5 (8.3)    | -123.3 (8.3)  | 154.9 (8.0)            | 181           |      | 8.5 (7.2)    | -137.0 (5.0)  | 145.5 (4.7)            | 194           |
|      | Annual | -43.8 (15.9)  | -373.2 (16.2) | 329.4 (15.7)           |               |      | 64.5 (11.9)  | -252.8 (8.4)  | 317.3 (7.8)            |               |
| 2013 | Dry    | -0.57 (4.6)   | -119.2 (3.5)  | 118.6 (4.6)            | 157           |      | -4.3 (2.4)   | -97.7 (2.0)   | 93.4 (2.5)             | 142           |
|      | Wet    | -30.0 (6.8)   | -146.9 (4.6)  | 116.8 (5.8)            | 208           |      | 6.1 (5.1)    | -137.9 (4.1)  | 144.0 (4.3)            | 223           |
|      | Annual | -30.6 (11.4)  | -266.1 (8.1)  | 235.5 (10.4)           |               |      | 1.8 (7.5)    | -235.6 (6.1)  | 237.5 (6.8)            |               |

Seasons with a La Niña or El Niño phase are marked with an \* and •, respectively.

doi:10.1371/journal.pone.0115058.t002

drought conditions (Table 2; Fig. 5c). The mean annual dry season length at TS was 172 days for the 5 years. During years with La Niña phases, CO<sub>2</sub> uptake was higher, dry seasons were 10 days longer on average, and TS was a greater sink for CO<sub>2</sub> (Table 2). As a result of an extended drought in 2011 that occurred with 2 La Niña phases, TS was a sink for CO<sub>2</sub> in both wet and dry seasons (Table 2).

Like patterns observed at TS, annual variation in NEE corresponded to changes in ENSO phase at SRS. Although SRS ranged from CO<sub>2</sub> neutral to a small source of CO<sub>2</sub> to the atmosphere annually and seasonally, CO<sub>2</sub> release rates increased during seasons with La Niña phases. SRS was a small source of CO<sub>2</sub> in most seasons, except in 2010 (El Niño) and the dry season of 2013 (neutral phase) (S2b Fig.).

Ecosystem respiration was the primary control on annual ecosystem carbon balance (Table 2) and dry season mean R<sub>eco</sub> was often higher than wet season R<sub>eco</sub>, increasing CO<sub>2</sub> release at SRS when the dry season was extended (S2b Fig.). Similar to TS, average daily CO<sub>2</sub> uptake rates were higher in the dry season at SRS (Table 2). Even so, dry season mean daily R<sub>eco</sub> rates were also higher than in the wet season (Table 2). Because R<sub>eco</sub> increased relative to CO<sub>2</sub> uptake in the dry season (Table 2; S2b Fig.), longer dry seasons were associated with greater CO<sub>2</sub> source status at SRS. During the exceptionally wet year that corresponded to an El Niño phase (2010), GEE surpassed R<sub>eco</sub> and the site became a larger sink for CO<sub>2</sub> (Table 2). Although site differences were apparent in patterns of dry season CO<sub>2</sub> exchange rates, there was no clear pattern in wet season CO<sub>2</sub> uptake rates at TS

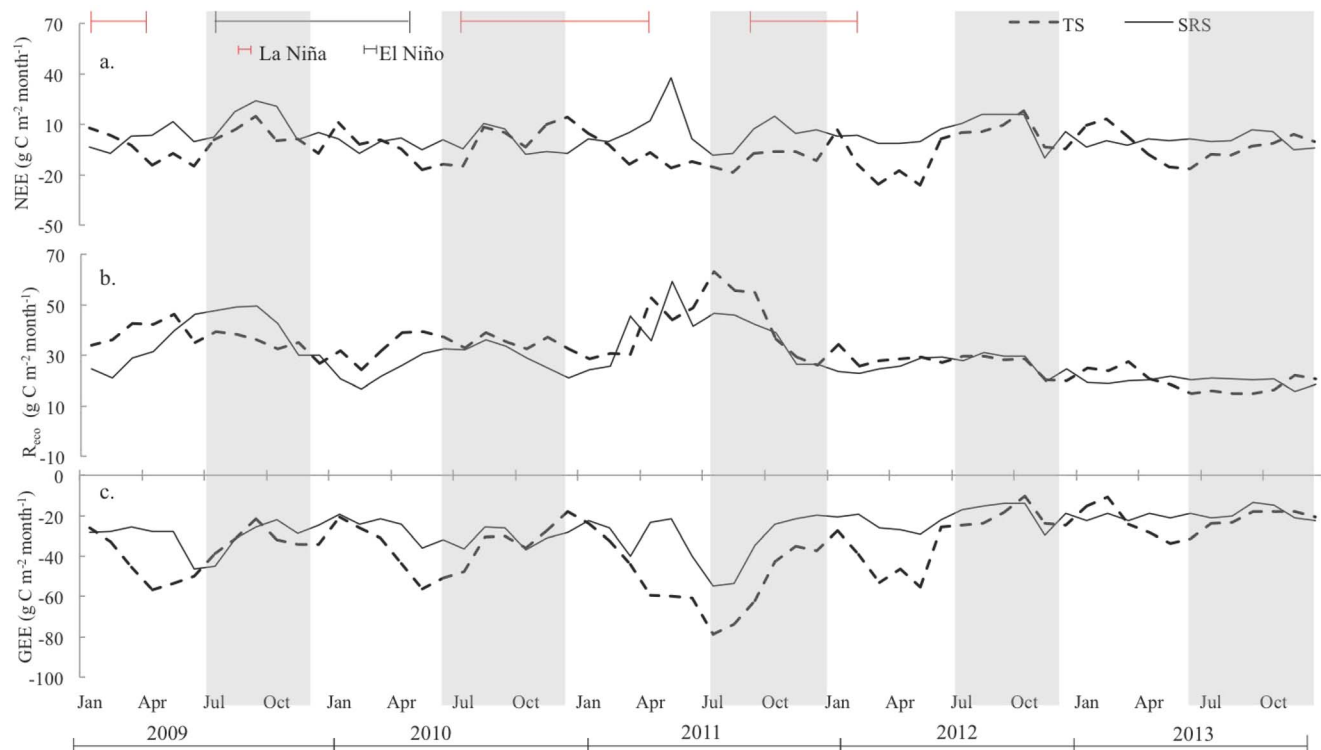

**Fig. 5. Time series of monthly (a) NEE, (b)  $R_{eco}$  and (c) GEE for TS and SRS.** Variations in both ENSO phase and CO<sub>2</sub> exchange rates co-occurred with changes in wet and dry season length.

doi:10.1371/journal.pone.0115058.g005

and SRS (Table 2; S2Fig. a and b; S3 Fig. b and d). At TS wet season NEE during the neutral phase was most similar to that of the La Niña phase at TS (Table 2; S3 Fig. a and b), while at SRS all wet seasons were similar except the 2011 wet season which co-occurred with the strongest La Niña phase (Table 2; S3c Fig.).

Plots of dry season length versus dry season cumulative NEE (Fig. 4b and 4c) revealed differences by site. Although there were very few observations available since the study period included just 5 dry seasons, NEE at TS exhibited a negative linear relationship with dry season length ( $p=0.0393$ ; Fig. 4b), while NEE at SRS showed a positive linear relationship ( $p=0.0206$ ; Fig. 4c). These results demonstrate that the seasonal response in NEE rates differed between sites, and suggest that dry season length (and changes in dry season length) may control the CO<sub>2</sub> source and sink status in the future. Although, the data set is not yet large enough to confirm the pattern between dry season length and dry season cumulative NEE as a characteristic of each site, this relationship is an important indication of how the sites respond differently to hydroperiods.

### Seasonal light and temperature response

In addition to site differences, ENSO phase and season altered photosynthetic capacity and ecosystem respiration (Table 3; Fig. 6). At both sites, photosynthetic

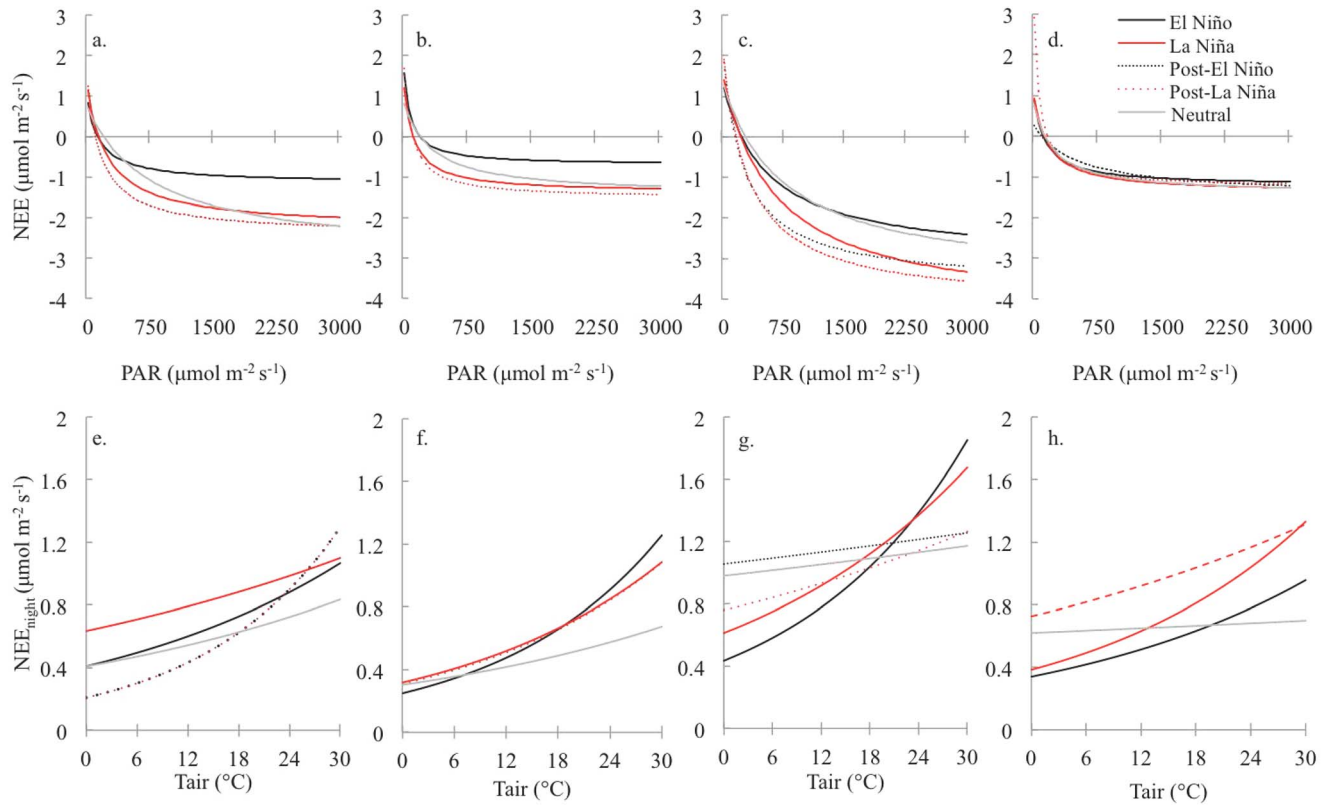

**Fig. 6. Light and Temperature Response Curves.** Light response curves showing differences in photosynthetic capacity by ENSO phase during the wet season at (a) TS and (b) SRS, and during the dry season at (c) TS and (d) SRS. Temperature response curves showing differences in the relationship between ecosystem respiration rates and temperature by ENSO phase during the wet season at (e) TS and (f) SRS, and during the dry season at (g) TS and (h) SRS. The shaded region highlights the wet season. At TS, there were 576 days (322 wet season; 254 dry season) in a La Niña phase, 304 days (188 wet season; 116 dry season) in an El Niño phase, 326 days (85 wet season; 241 dry season) in a post-La Niña phase, and 61 days (12 wet season; 49 dry season) in the post-El Niño phase, and 559 days (394 wet season; 165 dry season) in the neutral phase. At SRS, there were 576 days (308 wet season; 268 dry season) in a La Niña phase, 304 days (151 wet season; 153 dry season) in an El Niño phase, 326 days (85 wet season; 241 dry season) in a post-La Niña phase, 61 days (58 wet season; 3 dry season) in the post-El Niño phase, and 559 days in the neutral phase (401 wet season; 158 dry season).

doi:10.1371/journal.pone.0115058.g006

capacity ( $P_{max}$ ) was greatest during La Niña and directly following La Niña phases compared to rates during neutral and El Niño phases, although at higher PAR values ( $>1500 \mu\text{mol m}^{-2} \text{s}^{-1}$ ) curves for La Niña and the neutral phase converged (Fig. 6a and 6b). Seasonal differences in light and temperature response curves were greater, and photosynthetic capacity and dark respiration ( $R_{eco}$ ) were consistently higher at TS, for all ENSO phases as compared to SRS (Table 3; Figure 6a and 6c). At both sites, the effect of El Niño and La Niña phase was also greater during the dry season. At SRS, photosynthetic capacity was similar for all ENSO phases during the dry season though the effect of El Niño and La Niña phases increased during the wet season (Table 3; Fig. 6b and 6d). Overall, there was a small seasonal difference in photosynthetic capacity, which was higher on average in the wet season than in the dry season at SRS. At both sites, differences in photosynthetic capacity by ENSO phase were greatest at higher PAR values ( $>1000 \mu\text{mol m}^{-2} \text{s}^{-1}$ ).



**Table 3.** Model estimates from Eq.6 and 7 for TS and SRS by ENSO phase and season.

| Site         | ENSO         | Season  | Light Response Curves |           | Temperature Response Curves |        |         |
|--------------|--------------|---------|-----------------------|-----------|-----------------------------|--------|---------|
|              |              |         | $\alpha$              | $P_{max}$ | $R_{eco}$                   | $R_0$  | $b$     |
| TS           | El Niño      | Dry     | -0.0077               | -4.28     | 1.2063                      | 0.4361 | 0.0482  |
|              | La Niña      | Dry     | -0.0088               | -5.7676   | 1.4031                      | 0.6134 | 0.0335  |
|              | Post-El Niño | Dry     | -0.02                 | -5.4761   | 1.8287                      | 1.0559 | 0.0058  |
|              | Post-La Niña | Dry     | -0.0185               | -6.0613   | 1.9068                      | 0.7596 | 0.017   |
|              | Neutral      | Dry     | -0.00643              | -4.8674   | 1.2702                      | 0.9797 | 0.00598 |
|              | El Niño      | Wet     | -0.0122               | -1.9836   | 0.8323                      | 0.4096 | 0.0319  |
|              | La Niña      | Wet     | -0.0134               | -3.4053   | 1.147                       | 0.635  | 0.0183  |
|              | Post-La Niña | Wet     | -0.0209               | -3.6654   | 1.2564                      | 0.209  | 0.0608  |
|              | Neutral      | Wet     | -0.00466              | -3.7001   | 0.7102                      | 0.4088 | 0.0238  |
|              | SRS          | El Niño | Dry                   | -0.0149   | -2.0916                     | 0.8782 | 0.3408  |
| La Niña      |              | Dry     | -0.0138               | -2.3326   | 0.9367                      | 0.3846 | 0.0414  |
| Post-El Niño |              | Dry     | -0.0034               | -1.7188   | 0.254                       |        |         |
| Post-La Niña |              | Dry     | -0.0643               | -4.1691   | 2.9143                      | 0.7255 | 0.0198  |
| Neutral      |              | Dry     | -0.00972              | -2.1901   | 0.7655                      | 0.62   | 0.00399 |
| El Niño      |              | Wet     | -0.0281               | -2.2678   | 1.5688                      | 0.2496 | 0.0539  |
| La Niña      |              | Wet     | -0.0217               | -2.5837   | 1.1998                      | 0.3184 | 0.0409  |
| Post-La Niña |              | Wet     | -0.0359               | -3.1999   | 1.6757                      | 0.3089 | 0.0418  |
| Neutral      |              | Wet     | -0.00693              | -2.2765   | 0.8207                      | 0.3034 | 0.0267  |

doi:10.1371/journal.pone.0115058.t003

The relationship between temperature and  $R_{eco}$  differed between ENSO phases, and  $R_{eco}$  showed distinct seasonal patterns in temperature sensitivity (Table 3; Fig. 6e to 6h) at TS and SRS. During the wet season at both sites,  $R_{eco}$  was less sensitive to temperature changes. At TS temperature effects associated with ENSO phases were greater at lower temperatures (Table 3; Fig. 6e and 6f). At higher temperatures  $R_{eco}$  was more sensitive to changes in temperature during all phases at both sites, a response that was enhanced during the dry season (Table 3; Fig. 6g and 6h). At SRS, the differences among ENSO phases were small except at high temperatures (>24 °C) during the wet season, while at TS the differences among ENSO phases were consistently large at lower temperatures and converged at high temperatures (Fig. 6e to 6h). Similar to patterns observed in light response curves, respiration rates were higher at TS than at SRS, and temperature patterns associated with  $R_{eco}$  also showed greater release of CO<sub>2</sub> at both sites in the dry season versus the wet season (Fig. 6e to 6h).

### The effect of ENSO phase, precipitation, and season on daily CO<sub>2</sub> exchange rates and water level

After pre-whitening, some small (<0.05) but statistically significant autocorrelation remained in pre-whitened series; however, this sensitivity resulted from the large number of observations available and was judged to be biologically insignificant [47]. Differencing was required for water level and PDSI time series

due to the lack of stationarity at both sites. Non-stationarity indicates a lack of stability in the mean of these variables over time, further suggesting that there were significant changes in hydroperiods at both sites. By including differenced variables in models we evaluated how changes in water level and PDSI influenced NEE,  $R_{\text{eco}}$ , and GEE. In response to evidence of 1-month lagged teleconnections for ENSO phase effects on precipitation and average daily maximum and minimum temperatures (Table 1), lagged El Niño and La Niña phase indicators were included in time series models of CO<sub>2</sub> exchange rates.

Models for NEE (S4a and S5a Figs.), had a significant lagged 1-day MA [MA(1)] component, as well as significant AR components at a lag of 1-, and 2-days ( $p < 0.0001$ ; Table 4). At TS,  $\Delta$ water level ( $p = 0.01$ ) and the quantity of rain ( $\text{mm day}^{-1}$ ;  $p < 0.0001$ ) had significant positive relationships with NEE, showing that as the change in water level and the quantity of daily rainfall increased, net CO<sub>2</sub> uptake decreased (higher NEE; Table 4). Post-La Niña phases in the dry season were associated with significantly lower NEE (higher net CO<sub>2</sub> uptake) compared to neutral and El Niño phases at TS ( $p = 0.0039$ ); however, post-La Niña phases in the dry season at SRS were associated with greater NEE (lower net CO<sub>2</sub> uptake;  $p = 0.0394$ ). Moreover, there was a significant increase in NEE at TS (higher net CO<sub>2</sub> uptake) the day after rain. At TS where hydroperiods were shorter, the effect of rain and post-La Niña phase during the dry season were significantly stronger than at SRS (Table 4). The quantity of rain was the strongest driver of NEE at both sites.

Models for  $R_{\text{eco}}$  (S4b and S5b Figs.), at both sites had a significant 1-day MA [MA(1)], as well as significant AR components at a lag of 1- and 2-days ( $p < 0.001$ ; Table 5). The day after rain ( $p = 0.0047$ ), and post-La Niña phases in the dry season ( $p = 0.0291$ ) reduced daily ecosystem respiration rates at TS (Table 5), while the quantity of rain ( $p = 0.0596$ ), and post-El Niño phases in the dry season were associated with an increase in  $R_{\text{eco}}$ . At SRS, post-La Niña phases in the dry season ( $p = 0.0002$ ) were significantly linked to increased  $R_{\text{eco}}$  (Table 5), and the effect of post-La Niña phases in the dry season was larger at SRS where it was associated with increased  $R_{\text{eco}}$ . At SRS, post-La Niña phases had the greatest impact on  $R_{\text{eco}}$ , while at TS  $R_{\text{eco}}$  had the strongest association with the day following rain events.

Similar to NEE, models for GEE had a significant 1-day lagged MA [MA(1)] and AR [AR(1)] component at both sites ( $p < 0.0001$ ; Table 6; S4c and S5c Figs.). The day of rain ( $p < 0.0001$ ), day after rain ( $p = 0.0015$ ), quantity of rain ( $p < 0.0001$ ), and  $\Delta$ water level ( $p < 0.0001$ ) had significant positive relationships with GEE at TS (Table 6). At SRS, days with precipitation ( $p < 0.0001$ ) and  $\Delta$ water level ( $p = 0.005$ ) had positive relationships with GEE (Table 6). Rain had a stronger effect at TS than at SRS, and rain had the strongest effect on GEE at SRS, while  $\Delta$ water level had the strongest effect on GEE at TS (Table 6).

Models for the water index had a significant 1-day lagged MA [MA(1)] and AR [AR(1)] component at both sites ( $p < 0.0001$ ; Table 7; S4d and S5d Figs.). At TS, La Niña phases during the wet season ( $p < 0.0001$ ) and post-La Niña phases (wet season;  $p < 0.0001$ ) were associated with lower than average water levels compared

**Table 4.** Parameter estimates from ARIMA models of daily NEE by site.

| Parameter                 | Taylor Slough |                |         |        | Shark River Slough |                |         |        |
|---------------------------|---------------|----------------|---------|--------|--------------------|----------------|---------|--------|
|                           | Estimate      | Standard Error | t Value | Approx | Estimate           | Standard Error | t Value | Approx |
|                           |               |                |         | Pr> t  |                    |                |         | Pr> t  |
| MA(1)                     | 0.7760        | 0.0304         | 25.52   | <.0001 | 0.7652             | 0.0324         | 23.66   | <.0001 |
| AR(1)                     | 1.2808        | 0.0418         | 30.67   | <.0001 | 1.2954             | 0.0435         | 29.77   | <.0001 |
| AR(2)                     | -0.2998       | 0.0385         | -7.78   | <.0001 | -0.3153            | 0.0401         | -7.86   | <.0001 |
| Day After Rain            | 0.0346        | 0.0128         | 2.70    | 0.007  | 0.0171             | 0.0109         | 1.56    | 0.118  |
| Rain (mm)                 | 0.0073        | 0.0005         | 14.23   | <.0001 | * 0.0027           | 0.0004         | 6.21    | <.0001 |
| ΔWater Level (m)          | 0.3464        | 0.1415         | 2.45    | 0.0144 | 0.1377             | 0.1997         | 0.69    | 0.4904 |
| Post-La Niña (Wet Season) | -0.4943       | 0.1333         | -3.71   | 0.0002 | -0.0755            | 0.0954         | -0.79   | 0.4292 |
| Post-La Niña (Dry Season) | -0.2187       | 0.0758         | -2.89   | 0.0039 | * 0.1395           | 0.0678         | 2.06    | 0.0394 |

MA(1) is the estimated moving average term at a 1-period lag (1 day), and AR (1) and AR(2) are the estimated autoregressive terms at a 1- and 2-period lags (1 and 2 days). Lagged values of independent variables are denoted similarly. Asterisks denote significant differences between sites. *Day after rain* is an indicator for the first rain free day, *Rain* is the quantity of precipitation (mm), *ΔWater Level* is the change in water level from one day to the next, *Post-La Niña (Wet Season)* is an indicator for the time directly following a La Niña phase in the wet season, and *Post-La Niña (Dry Season)* is an indicator for the time directly following a La Niña phase in the dry season.

doi:10.1371/journal.pone.0115058.t004

to neutral and El Niño phases (Table 7). Water levels at TS were higher than the seasonal average the day of rain (0.0545), the day after rain (p=0.162), during dry season EL Niño phases (p<0.0001), and throughout post-La Niña phases that occurred at the end of the dry season (p<0.0001). At SRS, the day of rain (p=0.0349), the day after rain (p=0.0066) and post-La Niña phase at the end of the dry season (p<0.0001) were associated with higher than average water levels (Table 7). La Niña and post-La Niña phases (wet season; p<0.0001) were

**Table 5.** Parameter estimates from ARIMA models of daily R<sub>eco</sub> by site.

| Parameter                 | Taylor Slough |                |         |        | Shark River Slough |                |         |        |
|---------------------------|---------------|----------------|---------|--------|--------------------|----------------|---------|--------|
|                           | Estimate      | Standard Error | t Value | Approx | Estimate           | Standard Error | t Value | Approx |
|                           |               |                |         | Pr> t  |                    |                |         | Pr> t  |
| MA(1)                     | 0.8786        | 0.0211         | 41.6    | <.0001 | 0.8209             | 0.0226         | 36.29   | <.0001 |
| AR(1)                     | 1.5960        | 0.0355         | 44.95   | <.0001 | * 1.3410           | 0.0372         | 36.09   | <.0001 |
| AR(2)                     | -0.5962       | 0.0355         | -16.82  | <.0001 | * -0.3415          | 0.0371         | -9.21   | <.0001 |
| Day After Rain            | -0.0217       | 0.0077         | -2.83   | 0.0047 | 0.0045             | 0.0089         | 0.51    | 0.6126 |
| Rain (mm)                 | 0.0005        | 0.0003         | 1.88    | 0.0596 | -0.0002            | 0.0004         | -0.68   | 0.4943 |
| Post-La Niña (Dry Season) | -0.0908       | 0.0416         | -2.18   | 0.0291 | * 0.1544           | 0.0417         | 3.7     | 0.0002 |
| Post-El Niño (Dry Season) | 0.1479        | 0.0769         | 1.92    | 0.0545 | 0.0017             | 0.0757         | 0.02    | 0.982  |

MA(1) is the estimated moving average term at a 1- period lag (1 day), and AR (1) and AR(2) are the estimated autoregressive terms at a 1- and 2- period lags (1 and 2 days). Lagged values of independent variables are denoted similarly. Asterisks denote significant differences between sites. *Day after rain* is an indicator for the first rain free day, *Rain* is the quantity of precipitation (mm), *Post-La Niña (Dry Season)* is an indicator for the time directly following a La Niña phase in the dry season, and *Post-El Niño (Dry Season)* is an indicator for the time directly following a La Niña phase in the dry season.

doi:10.1371/journal.pone.0115058.t005

**Table 6.** Parameter estimates from ARIMA models of daily GEE by site.

| Parameter                 | Taylor Slough |                |         |        | Shark River Slough |                |         |        |
|---------------------------|---------------|----------------|---------|--------|--------------------|----------------|---------|--------|
|                           | Estimate      | Standard Error | t Value | Approx | Estimate           | Standard Error | t Value | Approx |
|                           |               |                |         | Pr> t  |                    |                |         | Pr> t  |
| MA(1)                     | 0.6113        | 0.0213         | 28.67   | <.0001 | 0.6406             | 0.0205         | 31.21   | <.0001 |
| AR(1)                     | 0.9975        | 0.0017         | 602.66  | <.0001 | 0.9967             | 0.0020         | 493.35  | <.0001 |
| Rain Day                  | 0.1263        | 0.0145         | 8.7     | <.0001 | * 0.0609           | 0.0135         | 4.52    | <.0001 |
| Day After Rain            | 0.0484        | 0.0152         | 3.18    | 0.0015 | -0.0113            | 0.0140         | -0.81   | 0.4207 |
| Rain (mm)                 | -0.0035       | 0.0007         | -5.12   | <.0001 | -0.0008            | 0.0007         | -1.11   | 0.2651 |
| ΔWater Level (m)          | 1.8698        | 0.2132         | 8.77    | <.0001 | 1.4030             | 0.4997         | 2.81    | 0.005  |
| Post-La Niña (Wet Season) | -0.2051       | 0.1337         | -1.53   | 0.125  | 0.0430             | 0.0843         | 0.51    | 0.6098 |

MA(1) is the estimated moving average term at a 1-period lag (1 day), and AR (1) is the estimated autoregressive term at a 1-period lag (1 day). Lagged values of independent variables are denoted similarly. Asterisks denote significant differences between sites. *Rain Day* is an indicator for days with precipitation>0, *Day After Rain* is the first rain-free day, *Rain* is the quantity of precipitation (mm), *ΔWater Level* is the change in water level from one day to the next, and *Post-La Niña (Wet Season)* is an indicator for the time directly following a La Niña phase in the wet season.

doi:10.1371/journal.pone.0115058.t006

**Table 7.** Parameter estimates from ARIMA models of the daily water index by site.

| Parameter                 | Taylor Slough |                |         |        | Shark River Slough |                |         |        |
|---------------------------|---------------|----------------|---------|--------|--------------------|----------------|---------|--------|
|                           | Estimate      | Standard Error | t Value | Approx | Estimate           | Standard Error | t Value | Approx |
|                           |               |                |         | Pr> t  |                    |                |         | Pr> t  |
| MA(1)                     | -0.2101       | 0.0262         | -8.02   | <.0001 | -0.1826            | 0.0262         | -6.97   | <.0001 |
| AR(1)                     | 0.9924        | 0.0031         | 318.42  | <.0001 | 0.9882             | 0.0040         | 246.96  | <.0001 |
| Rain Day                  | 0.0128        | 0.0066         | 1.92    | 0.0545 | 0.0109             | 0.0052         | 2.11    | 0.0349 |
| Day After Rain            | 0.0097        | 0.0069         | 1.4     | 0.162  | 0.0145             | 0.0053         | 2.72    | 0.0066 |
| Rain (mm)                 | 0.0024        | 0.0002         | 10.54   | <.0001 | * 0.0006           | 0.0002         | 3.52    | 0.0004 |
| La Niña (Wet Season)      | -1.6858       | 0.0608         | -27.71  | <.0001 | * -0.8015          | 0.0541         | -14.83  | <.0001 |
| El Niño (Dry Season)      | 0.9664        | 0.0673         | 14.36   | <.0001 | * -0.0793          | 0.0790         | -1      | 0.3156 |
| Post-La Niña (Wet Season) | -1.6847       | 0.0843         | -19.99  | <.0001 | * -1.2802          | 0.0535         | -23.92  | <.0001 |
| Post-La Niña (Dry Season) | 0.6185        | 0.0487         | 12.69   | <.0001 | * 0.3928           | 0.0390         | 10.07   | <.0001 |
| Post-El Niño (Dry Season) | -0.3547       | 0.0989         | -3.59   | 0.0003 | -0.4239            | 0.0851         | -4.98   | <.0001 |

MA(1) is the estimated moving average term at a 1-period lag (1 day), and AR (1) is the estimated autoregressive term at a 1-period lag (1 day). Lagged values of independent variables are denoted similarly. Asterisks denote significant differences between sites. *Rain Day* is an indicator for days with precipitation>0, *Day After Rain* is the first rain free day, *Rain* is the quantity of precipitation (mm), *La Niña (Wet Season)* is an indicator for wet season La Niña phases, *El Niño (Dry Season)* is an indicator for dry season El Niño phases, *Post-La Niña (Wet Season)* is an indicator for the time directly following a La Niña phase in the wet season, *Post-La Niña (Dry Season)* is an indicator for the time directly following a La Niña phase in the dry season, and *Post-El Niño (Dry Season)* is an indicator for the time directly following a El Niño phase in the dry season.

doi:10.1371/journal.pone.0115058.t007

associated with lower than average water levels. The effect of La Niña (wet season) and El Niño (dry season) phases were significantly greater at TS than at SRS, and La Niña and post- La Niña phases were the strongest predictors of the water index (Table 7).

## Discussion

*The goal of this research was to understand the relationship between ENSO phases and CO<sub>2</sub> exchange rates (NEE, R<sub>eco</sub> and GEE) in Everglades freshwater marsh ecosystems. The relationships between ENSO extremes, precipitation and hydrology in the Everglades region suggest that El Niño and La Niña phases could be important for C dynamics [1, 3, 48, 49, 50, 51, 52, 53, 54, 55]. The results presented here show that climate teleconnections have significant controls on Everglades CO<sub>2</sub> dynamics, demonstrating that in addition to climate change and water management, ENSO is an additional source of variation in C cycling in Everglades freshwater ecosystems.*

### Annual fluctuations in season length and intensity

Interannual variability in precipitation can be large in the Everglades region [21, 56], which was the case throughout the study period. Reduced precipitation prior to the onset of the wet season resulted in shorter wet seasons and lower water levels, though annual precipitation was unchanged. Cumulative precipitation in January through March was related to wet season length (Fig. 4a). Although more data is needed to validate this relationship, previous research suggests dry season rainfall from October to April largely determines season intensity [3, 56]. Higher precipitation from January to March was also associated with longer and wetter than average wet seasons. Interannual variation in the onset and length of seasons can have a significant effect on the magnitude of ecosystem primary production [57], and changes in season intensity can either suppress or enhance production [58]. Results suggest that in Everglades ecosystems dry season length has a strong relationship with annual NEE (S6 Fig.). Knowing that precipitation patterns were driving the variations observed in season length and intensity, we examined the co-occurrence of ENSO phases, previously found to alter season intensity in the Everglades region [3, 55], to PDSI defined season intensity.

Abnormal precipitation and water level patterns over the study period coincided with El Niño and La Niña phases. Changes in ENSO phase have been associated with shifts in the position of the midlatitude jet, which is important for patterns in frontal precipitation. In the Everglades where frontal precipitation is the main source of dry season rainfall [20], changes in ENSO phase can have a significant effect on hydroperiods. During El Niño (La Niña) phases, the equatorial (poleward) displacement of the midlatitude jet increases (decreases) frontal precipitation in the southeastern United States [1, 48, 49]. Studies have



shown that in Florida, El Niño is positively correlated with winter (dry season) precipitation, explaining up to 34% of dry season precipitation variability [4]. Here, El Niño and La Niña phases have been shown to reduce seasonal differences in rainfall without altering annual precipitation inputs [55].

Results found by Beckage et al. [3] and our study show that El Niño (La Niña) phases were correlated with increased (decreased) rainfall and water levels in the Everglades region. Time series analysis of the water index at TS and SRS reinforced the relationships previously found between precipitation patterns and ENSO phase. At both TS and SRS, La Niña and post- La Niña phases were associated with lower than average water levels and at TS water levels were higher than the seasonal average during the El Niño phase (dry season). The effect of La Niña (wet season) and El Niño (dry season) phases were significantly greater at TS than at SRS, and La Niña and post- La Niña phases were the strongest predictors of the water index at both sites. These results support the previously observed patterns in ENSO phases [3], precipitation, and hydrology and show that El Niño and La Niña phases induced fluctuations in season intensity (+ and -, respectively) compared to neutral phases, which affect season length, and have important implications for annual CO<sub>2</sub> exchange rates.

### Seasonal patterns in CO<sub>2</sub> exchange rates

Hydroperiods have shaped soil conditions and species composition at each site in ways that have led to different seasonal patterns in CO<sub>2</sub> exchange rates. Hydroperiods alter ecosystem production by interfering with exposed leaf area [11, 12, 16], triggering senescence (S. Oberbauer, unpublished data), and allowing CO<sub>2</sub> fixation within the water column [16]. Seasonal changes in photosynthetic capacity (Fig. 6) and the relationship between respiration rates and temperature support the patterns previously found in Everglade freshwater marsh studies [11, 12]. Knowing that season intensity changed with El Niño (+) and La Niña (-) phases (Fig. 3a), we expected and saw a magnification of the site-specific seasonal response in CO<sub>2</sub> exchange rates during and directly following El Niño and La Niña phases. The lag in El Niño and La Niña phase effect on CO<sub>2</sub> exchange rates is the result of the effect of extreme ENSO phases on water levels during transition periods. El Niño (La Niña) phases increase (decrease) surface water levels during seasonal transitions and, major drainages often contain no water during transitions in a La Niña phase [3]. Results suggest that Everglades freshwater marsh ecosystems are more similar during El Niño and neutral phases when water levels are higher. This is further reinforced by time series analysis, which detected significant changes in CO<sub>2</sub> exchange rates between ENSO and post-ENSO phases at TS and SRS.

The sites differed in their response to ENSO phases. At TS, CO<sub>2</sub> exchange rates were sensitive to El Niño and La Niña phase in both the wet and dry seasons, while at SRS the effect of El Niño and La Niña phase on the wet season was not as strong as the effect in the dry season. La Niña phases resulted in higher photosynthetic capacity and greater seasonal net carbon uptake rates in both

seasons at TS compared to neutral and El Niño phases. While La Niña increased photosynthetic capacity at SRS, the increase in  $R_{\text{eco}}$  reduced net exchange rates compared to neutral and El Niño phases. As a result of changes in GEE relative to  $R_{\text{eco}}$ , El Niño led to greater net CO<sub>2</sub> uptake at SRS during the dry season compared to La Niña and neutral phases. As water levels and precipitation increased, NEE and GEE also increased at both sites (less CO<sub>2</sub> and net CO<sub>2</sub> uptake). At TS where hydroperiods were shorter, the effect of rain and the post-La Niña phase during the dry season were significantly stronger than at SRS (Table 4). Rain was one of the strongest drivers of CO<sub>2</sub> dynamics and these results indicate that there is a significant relationship between El Niño and La Niña phase and season intensity, either creating conditions wetter (+) or dryer (-) than normal, which magnifies CO<sub>2</sub> exchange rates at TS and SRS.

### Annual patterns in CO<sub>2</sub> exchange rates

The results presented here show that the length and intensity of the wet and dry season varied annually with climate patterns. Considering the site-specific response to season, these results support our hypothesis that variations in season length would explain interannual fluctuations in NEE (S6 Fig.),  $R_{\text{eco}}$ , and GEE. At TS where mean GEE surpassed  $R_{\text{eco}}$  during the dry season, an increase in dry season length and intensity amplified the site's net CO<sub>2</sub> uptake rates. Annually, SRS was usually a small source of CO<sub>2</sub>, although when wet season conditions intensified during El Niño, net CO<sub>2</sub> uptake increased. The effect of ENSO phase also differed by site, showing that longer hydroperiods mute the effect of climate fluctuations on CO<sub>2</sub> exchange rates, and as water levels decline the system becomes more vulnerable to climate. The ecosystem's sensitivity to climate fluctuations has important implications for water management and climate change [59]. The uncertainty of climate change makes it important to understand how ecosystems respond to climate events and how these responses aggregate to form trends in net CO<sub>2</sub> exchange rates.

### Effect of climate change and water management on net CO<sub>2</sub> exchange rates

In sub-tropical ecosystems, phenology is less sensitive to temperature and photoperiod, and more tuned to seasonal shifts in precipitation [60, 61, 62]. Such shifts are expected to occur in concert with rising global temperatures, but both the direction and magnitude of change vary regionally [58, 63]. As climate change has the potential to alter hydrologic regimes, we can expect to see greater variations in CO<sub>2</sub> exchange rates. Shifts in water management and land use change (e.g., conversion to agriculture and urban development) could also significantly alter both hydrology and CO<sub>2</sub> dynamics in the Everglades region, making it important to develop a baseline understanding of how hydroperiod drives changes in CO<sub>2</sub> dynamics and how climate alters hydrology. With water managers striving to adjust hydroperiods closer to natural values, in the future we might expect

water levels in TS to increase, offsetting changes in climate by maintaining current patterns in hydrology. Alternatively, we might anticipate higher water levels to increase hydroperiods, making the system less sensitive to climate change altogether. With longer hydroperiods, SRS will likely remain less sensitive to changes in climate and land management. As a result, the two sites will likely behave more similarly in the future as SRS remains neutral or a very small source of CO<sub>2</sub> to the atmosphere and TS becomes more neutral.

Patterns observed in ENSO phases and the co-occurrence of extreme wet and dry seasons suggest changes in climate patterns can significantly alter ecosystem function. Equatorial Pacific SST during the past half century show a clear warming trend that is consistent with global warming [64], and El Niño and La Niña phases are expected to continue increasing in severity and frequency [3, 17, 58]. Moreover, as a result of warming SST, ENSO amplitude may become even stronger, intensifying feedbacks relevant to ENSO phases [64]. If the frequency and intensity of strong climatic disturbances increases beyond historical averages, altered disturbance regimes have the capacity to significantly modify ecosystem processes [65]. ENSO phases have been linked to climate anomalies [53] and CO<sub>2</sub> dynamics [66] on a global scale [53], making it crucial to analyze the importance of ENSO extremes and other cyclic climatic phenomenon on the variability of terrestrial carbon cycling.

## Study Limitations

This research shows that the length and intensity of the wet and dry season vary annually with ENSO phase in the subtropical Everglades region where dry season precipitation is dependent on frontal systems. Changes in season length and intensity are also correlated with CO<sub>2</sub> exchange rates showing that extreme ENSO phases magnify the site-specific seasonal response in freshwater marsh ecosystems. Although a longer time series is required to verify that this relationship is persistent, this research provides initial insights into an important driver of seasonal and inter-annual variation in CO<sub>2</sub> exchange rates in Everglades ecosystems.

## Supporting Information

**S1 Fig. ARIMA model versus observed data of (a) precipitation, (b) maximum temperature and minimum temperature.** Long-term weather data were obtained from NCDC Royal Palm Ranger Station (25° 23'N/80° 36'W), where NOAA surface meteorological data was available from 1964 to 2013.

[doi:10.1371/journal.pone.0115058.s001](https://doi.org/10.1371/journal.pone.0115058.s001) (TIF)

**S2 Fig. The ratio of GEE to R<sub>eco</sub> at TS and SRS.** Seasonal patterns in the ratio of GEE to R<sub>eco</sub> at (a) TS and (b) SRS shows that there is no clear pattern in wet season CO<sub>2</sub> uptake rates and the (c) annual ratio of GEE to R<sub>eco</sub> were most similar during El Niño and neutral phases at TS and SRS.

[doi:10.1371/journal.pone.0115058.s002](https://doi.org/10.1371/journal.pone.0115058.s002) (TIF)

**S3 Fig. Seasonal NEE at TS and SRS.** At TS patterns in (a) wet and (b) dry season NEE shows that net CO<sub>2</sub> uptake was greatest in years associated with La Niña phases (2011 and 2012). At SRS (a) wet and (b) dry season NEE suggests that the greatest net CO<sub>2</sub> uptake occurred in years associated with El Niño (2010) and neutral phases (2013).

[doi:10.1371/journal.pone.0115058.s003](https://doi.org/10.1371/journal.pone.0115058.s003) (TIF)

**S4 Fig. ARIMA model versus observed data of (a) NEE, (b) R<sub>eco</sub>, (c) GEE, and (d) the water index for TS.** An intervention time series approach was used to identify and model the relationship between CO<sub>2</sub> dynamics (*NEE*, *GEE*, and *R<sub>eco</sub>*) and a set of explanatory variables over a 5-year time series of daily data (2009 to 2013).

[doi:10.1371/journal.pone.0115058.s004](https://doi.org/10.1371/journal.pone.0115058.s004) (TIF)

**S5 Fig. ARIMA model versus observed data of (a) NEE, (b) R<sub>eco</sub>, (c) GEE, and (d) the water index for SRS.** An intervention time series approach was used to identify and model the relationship between CO<sub>2</sub> dynamics (*NEE*, *GEE*, and *R<sub>eco</sub>*) and a set of explanatory variables over a 5-year time series of daily data (2009 to 2013).

[doi:10.1371/journal.pone.0115058.s005](https://doi.org/10.1371/journal.pone.0115058.s005) (TIF)

**S6 Fig. The relationship between season length and NEE at TS and SRS.** NEE had a negative relationship with dry season length at (a) TS and a positive relationship with dry season length at (b) SRS. Annual NEE was positively correlated with wet season length at (c) TS and negatively correlated with wet season length at (d) SRS.

[doi:10.1371/journal.pone.0115058.s006](https://doi.org/10.1371/journal.pone.0115058.s006) (TIF)

## Acknowledgments

The authors would like to acknowledge the excellent support provided by the United States Forest Service Rocky Mountain Research Station (RMRS) and Henry W. Loescher acknowledges the National Science Foundation (NSF) (DBI-0752017) for their ongoing support. The National Ecological Observatory Network (NEON) is a project funded by the NSF and managed under cooperative agreement by NEON Inc. Any opinions, findings, and conclusions or recommendations expressed in this material are those of the authors and do not necessarily reflect the views of the NSF, NEON, or RMRS.

## Author Contributions

Conceived and designed the experiments: SLM CLS GS SFO HWL. Performed the experiments: SLM PO JLS. Analyzed the data: SLM CLS PO GS. Contributed reagents/materials/analysis tools: SFO GS MGR HWL. Wrote the paper: SLM CLS SFO PO MGR JLS HWL GS.

## References

1. **Ropelewski CF, Halpert MS** (1987) Global and regional scale precipitation patterns associated with the El Niño/Southern Oscillation. *Monthly Weather Review* 115: 1606–1626.
2. **Piechota TC, Dracup JA** (1996) Drought and Regional Hydrologic Variation in the United States: Associations with the El Niño Southern Oscillation. *Water Resources Research* 32: 1359–1373.
3. **Beckage B, Platt WJ, Slocum MG, Panko B** (2003) Influence of the El Niño Southern Oscillation on fire regimes in the Florida Everglades. *Ecology* 84: 3124–3130.
4. **Moses C S, Anderson WT, Saunders C, Sklar F** (2013) Regional climate gradients in precipitation and temperature in response to climate teleconnections in the Greater Everglades ecosystem of South Florida. *Journal of Paleolimnology* 49: 5–14.
5. **Meyers SD, O'Brien JJ** (1995) Pacific Ocean influences atmospheric carbon dioxide. *Eos Transactions American Geophysical Union* 76: 533–533.
6. **Trenberth KE** (1997) The Definition of El Niño. *Bulletin of the American Meteorological Society* 78: 2771–2777.
7. **Behrenfeld MJ** (2001) Biospheric Primary Production During an ENSO Transition. *Science* 291: 2594–2597.
8. **Davis SM, Ogden JC editors** (1994) *Everglades, the Ecosystem and its Restoration*. Delray Beach: St. Lucie Press.
9. **Allan RPR, Soden BJB** (2008) Atmospheric warming and the amplification of precipitation extremes. *Science* 321: 1481–1484.
10. **Barr JG, Engel V, Fuentes JD, Ziemann JC, O'Halloran TL, et al** (2010) Controls on mangrove forest-atmosphere carbon dioxide exchanges in western Everglades National Park. *Journal of Geophysical Research-Biosciences*: 115 doi:10.1002/(ISSN)1525-2027.
11. **Jimenez KL, Starr G, Staudhammer CL, Schedlbauer JL, Loescher HW, et al** (2012) Carbon dioxide exchange rates from short- and long-hydroperiod Everglades freshwater marsh. *Journal of Geophysical Research*: 117 doi:10.1029/2012JG002117.
12. **Schedlbauer JL, Oberbauer SF, Starr G, Jimenez KL** (2010) Seasonal Differences in the CO<sub>2</sub> Exchange of a Short-Hydroperiod Florida Everglades Marsh. *Agricultural and Forest Meteorology* 150: 994–1006.
13. **Malone SL, Starr G, Staudhammer CL, Ryan MG** (2013) Effects of simulated drought on the carbon balance of Everglades short-hydroperiod marsh. *Global Change Biology* 19: 2511–2523.
14. **Gorham E** (1991) Northern Peatlands: Role in the Carbon Cycle and Probable Responses to Climatic Warming. *Ecological Applications* 1: 182–195.
15. **Whiting GJ, Chanton JP** (2001) Greenhouse carbon balance of wetlands: methane emission versus carbon sequestration. *Tellus B* 53: 521–528.
16. **Schedlbauer JL, Munyon JW, Oberbauer SF, Gaiser EE** (2012) Controls on ecosystem carbon dioxide exchange in short- and long-hydroperiod Florida Everglades freshwater marshes. *Wetlands* 32: 801–812.
17. **Timmermann A, Oberhuber J, Bacher A, Esch M, Latif M, et al** (1999) Increased El Niño frequency in a climate model forced by future greenhouse warming. *Nature* 398: 694–697.
18. **Christensen JH, Hewitson B, Busuioac A, Chen A, Gao X, et al** (2007) Regional climate projections. *Climate Change, 2007: The Physical Science Basis. Contribution of Working group I to the Fourth Assessment Report of the Intergovernmental Panel on Climate Change*. Cambridge: University Press. 847–940 p.
19. **Li L, Li W, Kushnir Y** (2011) Variation of the North Atlantic subtropical high western ridge and its implication to Southeastern US summer precipitation. *Climate Dynamics* 39: 1401–1412.
20. **Chen E, Gerber JF** (1992) *Climate*. In Myers RL, Ewel JJ, editors. *Ecosystems of Florida*. Orlando: University of Central Florida Press.
21. **Obeysekera J, Browder J, Hornung L, Harwell MA** (1999) The natural South Florida system I: Climate, geology, and hydrology. *Urban Ecosystems* 3: 223–244.

22. **Loveless CM** (1959) A Study of the Vegetation in the Florida Everglades. *Ecology* 40: 1–9.
23. **Duever MJ, Carlson JE, Riopelle LA, Duever LC** (1978) Ecosystem analysis at Corkscrew Swamp. In *Cypress Wetlands for Water Management, Recycling, and Conservation*, 4th annual Report to the National Science Foundation and to the Rockefeller Foundation, Gainesville: University of Florida Press. 534–570 p.
24. **Godfrey RK, Wooten JW** (1979) *Aquatic and wetland plants of southeastern United States: Monocotyledons*. Athens: The University of Georgia Press. 712 p.
25. **Radford AE, Ahles HE, Bell CR** (1968) *Manual of the vascular flora of the Carolinas*. Chapel Hill: University of North Carolina Press. 1183 p.
26. **Kljun N, Rotach MW, Schmid HP** (2002) A Three-Dimensional Backward Lagrangian Footprint Model For A Wide Range Of Boundary-Layer Stratifications. *Boundary-Layer Meteorology* 103: 205–226.
27. **Kljun N, Calanca P, Rotach MW, Schmid HP** (2004) A Simple Parameterisation for Flux Footprint Predictions. *Boundary-Layer Meteorology* 112: 503–523.
28. **Veldkamp E, O'Brien JJ** (2000) Calibration of a Frequency Domain Reflectometry Sensor for Humid Tropical Soils of Volcanic Origin. *Soil Science Society of America Journal* 64: 1549–1553.
29. **Loescher HW, Law BE, Mahrt L, Hollinger DY** (2006) Uncertainties in and interpretation of, carbon flux estimates using the eddy covariance technique. *Journal of Geophysical Research-Atmospheres* 111.
30. **Schotanus P, Nieuwstadt FTM, De Bruin HAR** (1983) Temperature measurement with a sonic anemometer and its application to heat and moisture fluxes. *Boundary-Layer Meteorology* 26: 81–93.
31. **Webb EK, Pearman GI, Leuning R** (1980) Correction of flux measurements for density effects due to heat and water vapour transfer. *Quarterly Journal of the Royal Meteorological Society* 106: 85–100.
32. **Clement R** (1999) Edire. Available: <http://www.geos.ed.ac.uk/abs/research/micromet/EdiRe>.
33. **Aubinet M, Grelle A, Ibrom A, Rannik J, Moncrieff J, et al** (2000) Estimates of the annual net carbon and water exchange of forests: the EUROFLUX methodology. *Advances in Ecological Research* 30: 113–175.
34. **Massman WJ** (2004) Toward an ozone standard to protect vegetation based on effective dose: a review of deposition resistances and a possible metric. *Atmospheric Environment* 38: 2323–2337.
35. **Goulden ML, Munger JW, Fan SM** (1996) Measurements of carbon sequestration by longterm eddy covariance: Methods and a critical evaluation of accuracy. *Global Climate Change Biology* 2: 169–182.
36. **Clark KL, Gholz H, Moncrieff JB, Cropley F, Loescher HW** (1999) Environmental Controls over Net Exchanges of Carbon Dioxide from Contrasting Florida Ecosystems. *Ecological Applications* 9: 936–948.
37. **Foken T, Wichura B** (1996) Tools for quality assessment of surface-based flux measurements. *Agricultural and Forest Meteorology* 78: 83–105.
38. **Foken T, Leclerc MY** (2004) Methods and limitations in validation of footprint models. *Agricultural and Forest Meteorology* 127: 223–234.
39. **Malone SL, Staudhammer CL, Loescher HL, Olivas P, Oberbauer SF, et al** (2014) Seasonal patterns in energy partitioning of two freshwater marsh ecosystems in the Florida Everglades. *Journal of Geophysical Research-Biogeosciences* 119: 1487–1505.
40. **Nuttle WK** (1997) Measurement of wetland hydroperiod using harmonic analysis. *Wetlands* 17: 82–89.
41. **Palmer W** (1965) *Meteorological Drought* (No. 45) U.S. Department of Commerce Weather Bureau. 58 p.
42. **Brocklebank JC, Dickey DA** (2003) *SAS System for Forecasting Time Series*. Cary: SAS Institute Inc.
43. **Dickey DA, Fuller WA** (1979) Distribution of the Estimators for Autoregressive Time Series with a Unit Root. *Journal of the American Statistical Association* 74: 427–431.
44. **Hintze J** (2004) *Number Crunching Statistical Systems*. Available: [www.NCSS.com](http://www.NCSS.com).
45. **Svoboda M** (2000) An Introduction to the Drought Monitor (No. 80). *Drought Network News* (1994–2001). Available: <http://digitalcommons.unl.edu/droughtnetnews/80>.



46. **Pankratz A** (1983) *Forecasting With Univariate Box–Jenkins Models Concepts and Cases*. New York: Wiley.
47. **Malone SL, Staudhammer CL, Loescher HW, Olivas P, Oberbauer SF, et al** (2014) Seasonal patterns in energy partitioning of two freshwater marsh ecosystems in the Florida Everglades, *Journal of Geophysical Research-Biogeosciences* 119: 1487–1505.
48. **Ropelewski CF, Halpert MS** (1986) North American precipitation and temperature patterns associated with the El Niño/Southern Oscillation (ENSO). *Monthly Weather Review* 114: 2352–2362.
49. **Kiladis GN, Diaz HF** (1989) Global Climatic Anomalies Associated with Extremes in the Southern Oscillation. *Journal of Climate* 2: 1069–1090.
50. **Hanson K, Maul GA** (1991) Florida Precipitation and the Pacific El Niño, 1895–1989. *Florida Academy of Sciences* 54: 160–168.
51. **Sittel MC** (1994) Marginal probabilities of the extremes of ENSO events for temperature and precipitation in the southeastern United States. Technical Report. Center for Ocean Atmospheric Studies. Tallahassee: Florida State University Press. 155 p.
52. **Livezey RE, Masutani M, Leetmaa A, Rui H, Ji M, et al** (1997) Teleconnective response of the Pacific–North American region atmosphere to large central equatorial Pacific SST anomalies. *Journal of Climate* 10: 1787–1820.
53. **Mason SJ, Goddard L** (2001) Probabilistic precipitation anomalies associated with ENSO. *Bulletin of the American Meteorological Society* 82: 619–638.
54. **Schmidt N, Lipp EK, Rose JB, Luther ME** (2001) ENSO influences on seasonal rainfall and river discharge in Florida. *Journal of Climate* 14: 615–628.
55. **Childers DL** (2006) A synthesis of long-term research by the Florida Coastal Everglades LTER Program. *Hydrobiologia* 569: 531–544.
56. **Duever MJ, Meeder JF, Meeder LC, McCollom JM** (1994) The climate of south Florida and its role in shaping the Everglades ecosystem. In S. M. Davis & J. C. Ogden, editors. *Everglades: the Ecosystem and its Restoration*. Delray Beach: St. Lucie Press.
57. **Randerson JT, Field CB, Fung IY, Tans PP** (1999) Increases in early season ecosystem uptake explain recent changes in the seasonal cycle of atmospheric CO<sub>2</sub> at high northern latitudes. *Geophysical Research Letters* 26: 2765–2768.
58. **Cleland EE, Chuine I, Menzel A, Mooney HA, Schwartz MD** (2007) Shifting plant phenology in response to global change. *Trends in Ecology and Evolution* 22: 357–365.
59. **Stanton EA, Ackerman F** (2007) Florida and climate change: the costs of inaction. Florida and climate change: the costs of inaction. Global Development and Environment Institute. Medford: Tufts University.
60. **Reich PB** (1995) Phenology of tropical forests: patterns, causes, and consequences. *Canadian Journal of Botany* 73: 164–174.
61. **Morellato LPC** (2003) South America. In Schwartz M. *Phenology: An Integrative Environmental Science*. New York: Springer. 75–92 p.
62. **Sanchez-Azofeifa A, Kalacska ME, Quesada M, Stoner KE, Lobo JA, et al** (2003) Tropical Dry Climates. In *Phenology An Integrative Environmental Science*. Dordrecht: Springer 121–137 p.
63. **Cubasch U, Meehl GA, Boer GJ, Stouffer RJ** (2001) Projections of Future Climate Change. In *Climate Change 2001: The Scientific Basis. Contribution of Working Group I to the Third Assessment Report of the Intergovernmental Panel on Climate Change*. Cambridge: Cambridge University Press. 524–482 p.
64. **Latif MM, Keenlyside NSN** (2009) El Niño/Southern Oscillation response to global warming. *PNAS* 106: 20578–20583.
65. **Rolim SG, Jesus RM, Nascimento HEM, Couto HTZ, Chambers JQ** (2005) Biomass change in an Atlantic tropical moist forest: the ENSO effect in permanent sample plots over a 22-year period. *Oecologia* 142: 238–246.
66. **Hashimoto H, Nemani RR, White MA, Jolly WM, Piper SC, et al** (2004) El Niño–Southern Oscillation–induced variability in terrestrial carbon cycling. *Journal of Climate* 109: doi:10.1029/2004JD004959.
